# Supplementary material for: Synthesis of isoquinolones by visible-light-induced deaminative [4+2] annulation reactions
Source: Royal Society of Chemistry journal article supplement (doi:10.1039/d0cc01333a), 2020-01-01

## Supporting Information

### **Synthesis of Isoquinolones by Visible-Light-Induced Deaminative [4+2] Annulation**

Yating Zhao<sup>\*,ab</sup>, Chengcheng Shi<sup>b</sup>, Xing Su<sup>a</sup>, and Wujiong Xia<sup>\*,b</sup>

<sup>a</sup> College of Chemical and Material Engineering, Quzhou University,  
Quzhou 324000

<sup>b</sup> State Key Lab of Urban Water Resource and Environment, School of  
Science, Harbin Institute of Technology (Shenzhen), Shenzhen 518055

\*E-mail: [xiawj@hit.edu.cn](mailto:xiawj@hit.edu.cn)

### **Table of contents**

1. General Information
2. General Procedure for Synthesis of Pyridinium Salts

### 3. General Procedure for [4+2] Annulation Reaction

### 4. Characterizations of [4+2] Annulation Products

### 5. Mechanistic Studies

### 6. NMR Spectra

## 1. General Information

Chemicals were purchased from commercial sources without further purification unless otherwise noted. Glassware was dried in oven and cooled before use. All reactions were performed with solvents dried by anhydrous  $\text{MgSO}_4$ . Reactions were monitored by TLC and visualized by UV lamp (254nm) and stained with ethanolic solution of concentrated sulfuric acid or potassium permanganate. Yields generally referred to chromatographically isolated yields, unless otherwise noted.  $^1\text{H}$  NMR (600MHz) and  $^{13}\text{C}$  NMR (151 MHz) spectra are recorded on a Bruker AV-400 spectrometer in  $\text{CDCl}_3$ -*d* or  $\text{DMSO-}d_6$ . For  $^1\text{H}$  NMR (600MHz),  $\text{CDCl}_3$ -*d* ( $\delta$ = 7.26 ppm) served as internal standard and data are reported as follows: chemical shift (in ppm), multiplicity (s = singlet, d = doublet, t = triplet, q = quartet, m = multiplet, br = broad), coupling constant (in Hz), and integration. For  $^{13}\text{C}$  NMR (151 MHz),  $\text{CDCl}_3$ -*d* ( $\delta$ = 77.25 ppm) was used as internal standard. For  $^1\text{H}$  NMR (600 MHz),  $\text{DMSO-}d_6$  ( $\delta$ = 2.50 ppm) was used as internal standard. For  $^{13}\text{C}$  NMR (151 MHz),  $\text{DMSO-}d_6$  ( $\delta$ = 39.52 ppm) was used as internal standard. HR-MS spectra were recorded on a Bruker Esquire LC mass spectrometer using electrospray ionization.

## 2. General Procedure for Synthesis of Pyridinium Salts

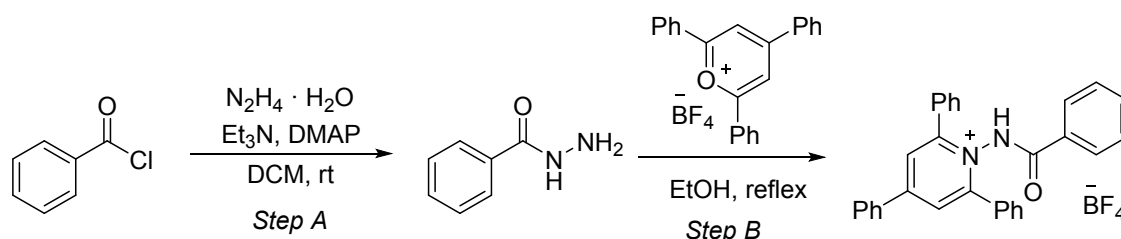

**Step A:** To a 100 mL round bottom flask equipped with magnetic stir bar was added Hydrazine (20.0 mmol, 80% aq.) in 10 mL  $\text{CH}_2\text{Cl}_2$ . Then triethylamine (25.0 mmol) and DMAP (1.6 mmol) were added followed by stirring the mixture under the ice bath. When cooling to 0 °C, benzoyl chloride was added into the mixture and stirred for 30 min. Thereafter the mixture was allowed to stir overnight at room temperature, and then was concentrated and purified by Silica column chromatography to give the pure benzohydrazide in 81% yield.

**Step B:** To a 50 mL round bottom flask equipped with magnetic stir bar was added the obtained benzohydrazide (1.8 g), 2,4,6-triphenylpyridinium tetrafluoroborate (3.5 g) in 10 mL methanol. The mixture was refluxed for 4 h, and then was cooled and added ethoxyethane (40 mL) slowly to precipitate white solid. The white solid was obtained via vacuum filtration to give the final product.

### 3. General Procedure for [4+2] Annulation Reaction

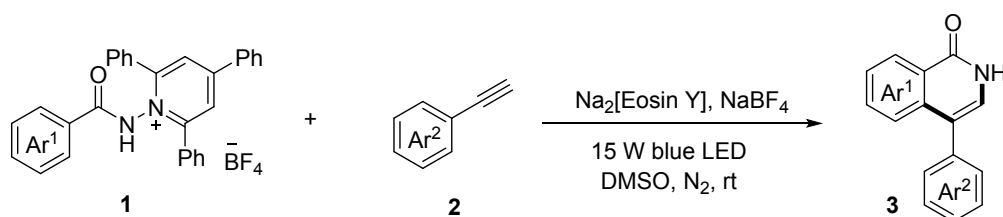

**1** (0.1 mmol), **2** (0.4 mmol), 0.15 mmol  $\text{NaBF}_4$  and photocatalyst  $\text{Na}_2[\text{Eosin Y}]$  (5 mol%) were combined in a 5 ml flask. 1 ml anhydrous DMSO was added via syringe. The flask was evacuated and back-filled with  $\text{N}_2$ . And then the starting mixture was exposed to a 15 W blue LED bulb for irradiation. After reaction, the mixture was quenched with water and extracted with DCM. The combined organic layer was dried with anhydrous  $\text{MgSO}_4$  and then filtered. The filtrate was concentrated for purification by chromatography on silica gel to afford final product **3**.

### 4. Characterizations of [4+2] Annulation Products

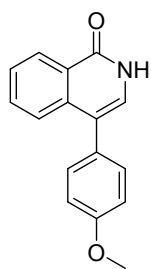

4-(4-methoxyphenyl)isoquinolin-1(2H)-one (**3aa**), white solid,  $R_f = 0.4$  (25% ethyl acetate in petroleum), 72% isolated yield.  $^1\text{H}$  NMR (600 MHz,  $\text{DMSO-}d_6$ )  $\delta$  11.42 (s, 1H), 8.29 (d,  $J = 7.9$  Hz, 1H), 7.69 (t,  $J = 7.6$  Hz, 1H), 7.53 (t,  $J = 7.5$  Hz, 1H), 7.49 (d,  $J = 8.2$  Hz, 1H), 7.34 (d,  $J = 7.5$  Hz, 2H), 7.04 (d,  $J = 7.2$  Hz, 3H), 3.81 (s, 3H).  $^{13}\text{C}$  NMR (151 MHz,  $\text{DMSO-}d_6$ )  $\delta$  161.2, 158.6, 136.9, 132.3, 130.9, 128.3, 127.4, 127.2, 126.4, 125.8, 124.3, 117.0, 114.0, 55.1. HRMS (ESI): calc. for  $\text{C}_{16}\text{H}_{14}\text{NO}_2$   $[\text{M}+\text{H}]^+$ : 252.1019, found: 252.1043.

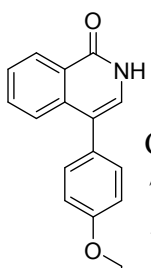

(4-ethoxyphenyl)isoquinolin-1(2H)-one (**3ab**), white solid,  $R_f = 0.4$  (25% ethyl acetate in petroleum), 68% isolated yield.  $^1\text{H}$  NMR (600 MHz,  $\text{Chloroform-}d$ )  $\delta$  11.66 (s, 1H), 8.51 (d,  $J = 7.8$  Hz, 1H), 7.63 (dt,  $J = 15.2$ , 7.5 Hz, 2H), 7.53 (t,  $J = 6.8$  Hz, 1H), 7.32 (d,  $J = 7.5$  Hz, 2H), 7.15 (s, 1H), 7.00 (d,  $J = 7.6$  Hz, 2H), 4.11 (q,  $J = 6.0$  Hz, 2H), 1.47 (t,  $J = 6.3$  Hz, 3H).  $^{13}\text{C}$  NMR (151 MHz,  $\text{Chloroform-}d$ )  $\delta$  158.6, 137.8, 132.5, 131.1, 128.7, 128.4, 127.6, 127.4, 126.7, 126.5, 125.1, 119.9, 114.6, 63.6, 14.9. HRMS (ESI): calc. for  $\text{C}_{17}\text{H}_{16}\text{NO}_2$   $[\text{M}+\text{H}]^+$ : 266.1176, found: 266.1172.

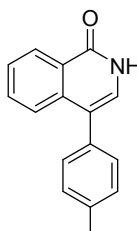

4-(p-tolyl)isoquinolin-1(2H)-one (**3ac**), white solid,  $R_f = 0.3$  (50% DCM in petroleum), 58% isolated yield.  $^1\text{H}$  NMR (600 MHz,  $\text{DMSO-}d_6$ )  $\delta$  11.44 (s, 1H), 8.29 (d,  $J = 8.0$  Hz, 1H), 7.69 (t,  $J = 7.6$  Hz, 1H), 7.55 – 7.52 (m, 1H), 7.51 (d,  $J = 8.1$  Hz, 1H), 7.31 (s, 4H), 7.06 (d,  $J = 5.2$  Hz, 1H), 2.38 (s, 3H).  $^{13}\text{C}$  NMR (101 MHz,  $\text{DMSO-}d_6$ )  $\delta$  161.7, 137.2, 137.1, 133.7, 132.9, 130.1, 129.7, 128.0, 127.7, 126.9, 126.4, 124.8, 117.8, 21.3. HRMS (ESI): calc. for  $\text{C}_{16}\text{H}_{14}\text{NO}$   $[\text{M}+\text{H}]^+$ : 236.1070, found: 236.1060.

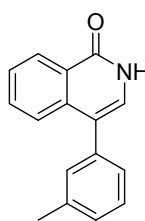

4-(m-tolyl)isoquinolin-1(2H)-one (**3ad**), white solid,  $R_f = 0.3$  (50% DCM in petroleum), 54% isolated yield.  $^1\text{H}$  NMR (600 MHz,  $\text{DMSO-}d_6$ )  $\delta$  11.46 (s, 1H), 8.30 (d,  $J = 7.7$  Hz, 1H), 7.70 (t,  $J = 6.4$  Hz, 1H), 7.57 – 7.49 (m, 2H), 7.37 (d,  $J = 6.9$  Hz, 1H), 7.23 (d,  $J = 11.3$  Hz, 3H), 7.08 (s, 1H), 2.38 (s, 3H).  $^{13}\text{C}$  NMR (101 MHz,  $\text{DMSO-}d_6$ )  $\delta$  161.7, 138.4, 137.1, 136.6, 132.9, 130.8, 129.0, 128.5, 128.1, 127.7, 127.3, 127.0, 126.4, 124.8, 118.0,

21.5. HRMS (ESI): calc. for C<sub>16</sub>H<sub>14</sub>NO [M+H]<sup>+</sup>: 236.1070, found: 236.1060.

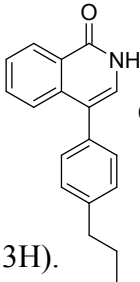 4-(4-propylphenyl)isoquinolin-1(2H)-one (**3ae**), white solid, R<sub>f</sub> = 0.4 (25% ethyl acetate in petroleum), 56% isolated yield. <sup>1</sup>H NMR (600 MHz, Chloroform-*d*) δ 11.75 (s, 1H), 8.51 (d, *J* = 7.9 Hz, 1H), 7.64 (s, 2H), 7.57 – 7.50 (m, 1H), 7.33 (d, *J* = 6.9 Hz, 2H), 7.28 (d, *J* = 6.9 Hz, 2H), 7.18 (s, 1H), 2.67 (t, *J* = 6.9 Hz, 2H), 1.72 (q, *J* = 6.9 Hz, 2H), 1.01 (t, *J* = 6.5 Hz, 3H). <sup>13</sup>C NMR (151 MHz, Chloroform-*d*) δ 164.0, 142.1, 137.5, 133.5, 132.4, 129.8, 128.7, 127.6, 126.7, 126.6, 125.8, 125.0, 120.1, 37.8, 24.5, 13.9. HRMS (ESI): calc. for C<sub>18</sub>H<sub>18</sub>NO [M+H]<sup>+</sup>: 264.1383, found: 264.1376.

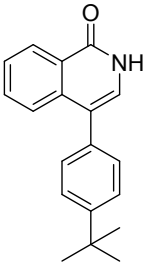 4-(4-(tert-butyl)phenyl)isoquinolin-1(2H)-one (**3af**), white solid, R<sub>f</sub> = 0.4 (25% ethyl acetate in petroleum), 59% isolated yield. <sup>1</sup>H NMR (600 MHz, Chloroform-*d*) δ 11.56 (s, 1H), 8.52 (d, *J* = 8.0 Hz, 1H), 7.70 – 7.64 (m, 2H), 7.54 (t, *J* = 7.3 Hz, 1H), 7.49 (d, *J* = 7.2 Hz, 2H), 7.36 (d, *J* = 7.1 Hz, 2H), 7.17 (s, 1H), 1.40 (s, 9H). <sup>13</sup>C NMR (151 MHz, Chloroform-*d*) δ 163.9, 150.6, 137.6, 133.3, 132.5, 129.6, 127.6, 126.8, 126.5, 125.6, 125.2, 120.1, 34.7, 31.4. HRMS (ESI): calc. for C<sub>19</sub>H<sub>20</sub>NO [M+H]<sup>+</sup>: 278.1539, found: 278.1535.

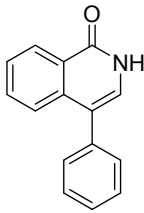 4-phenylisoquinolin-1(2H)-one (**3ag**), white solid, R<sub>f</sub> = 0.4 (25% ethyl acetate in petroleum) 54% isolated yield. <sup>1</sup>H NMR (600 MHz, DMSO-*d*<sub>6</sub>) δ 11.48 (s, 1H), 8.31 (d, *J* = 7.9 Hz, 1H), 7.70 (t, *J* = 7.6 Hz, 1H), 7.54 (t, *J* = 7.5 Hz, 1H), 7.52 – 7.47 (m, 3H), 7.44 (t, *J* = 6.9 Hz, 3H), 7.10 (s, 1H). <sup>13</sup>C NMR (101 MHz, DMSO-*d*<sub>6</sub>) δ 161.8, 137.1, 136.7, 132.9, 130.2, 129.2, 128.3, 127.9, 127.8, 127.0, 126.4, 124.7, 117.9. HRMS (ESI): calc. for C<sub>15</sub>H<sub>11</sub>NO [M+H]<sup>+</sup>: 222.0913, found: 222.0906.

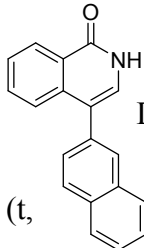 4-(naphthalen-2-yl)isoquinolin-1(2H)-one (**3ah**), white solid, R<sub>f</sub> = 0.4 (25% ethyl acetate in petroleum), 74% isolated yield. <sup>1</sup>H NMR (600 MHz, DMSO-*d*<sub>6</sub>) δ 11.55 (s, 1H), 8.33 (d, *J* = 8.0 Hz, 1H), 8.03 (d, *J* = 8.1 Hz, 1H), 7.99 (s, 2H), 7.87 (d, *J* = 7.2 Hz, 1H), 7.71 (t, *J* = 7.4 Hz, 1H), 7.58 (t, *J* = 9.8 Hz, 4H), 7.45 (t, *J* = 7.1 Hz, 1H), 7.23 (d, *J* = 4.2 Hz, 1H). <sup>13</sup>C NMR (101 MHz, DMSO-*d*<sub>6</sub>) δ 161.8, 137.2, 134.3, 133.7, 133.0, 132.6,

128.7, 128.6, 128.4, 128.4, 128.1, 127.9, 127.8, 127.1, 126.9, 126.7, 126.4, 124.8, 117.8. HRMS (ESI): calc. for  $C_{19}H_{20}NO$   $[M+H]^+$ : 272.1070, found: 272.1078.

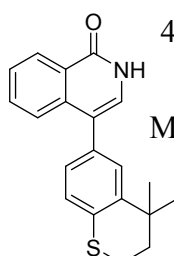 4-(4,4-dimethylthiochroman-6-yl)isoquinolin-1(2H)-one (**3ai**), white solid,  $R_f$  = 0.4 (50% DCM in petroleum), 63% isolated yield.  $^1H$  NMR (600 MHz, Chloroform-*d*)  $\delta$  11.65 (s, 1H), 8.52 (d,  $J$  = 7.9 Hz, 1H), 7.65 (q,  $J$  = 8.7, 8.2 Hz, 2H), 7.54 (t,  $J$  = 7.0 Hz, 1H), 7.40 (s, 1H), 7.20 – 7.15 (m, 2H), 7.10 (d,  $J$  = 7.9 Hz, 1H), 3.12 – 3.05 (m, 2H), 2.07 – 1.99 (m, 2H), 1.37 (s, 6H).  $^{13}C$  NMR (151 MHz, Chloroform-*d*)  $\delta$  163.9, 142.4, 137.6, 132.6, 132.0, 131.4, 128.1, 127.7, 127.6, 126.8, 126.7, 126.5, 125.0, 120.2, 37.7, 33.1, 30.3, 23.2. HRMS (ESI): calc. for  $C_{20}H_{20}NOS$   $[M+H]^+$ : 322.1260, found: 322.1255.

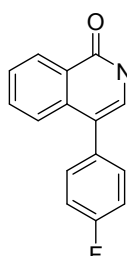 4-(4-fluorophenyl)isoquinolin-1(2H)-one (**3aj**), white solid,  $R_f$  = 0.4 (25% ethyl acetate in petroleum), 63% isolated yield.  $^1H$  NMR (600 MHz, DMSO-*d*<sub>6</sub>)  $\delta$  11.49 (s, 1H), 8.30 (dd,  $J$  = 8.0, 1.0 Hz, 1H), 7.70 (ddd,  $J$  = 8.4, 7.2, 1.4 Hz, 1H), 7.56 – 7.52 (m, 1H), 7.48 – 7.44 (m, 3H), 7.34 – 7.29 (m, 2H), 7.10 (d,  $J$  = 5.0 Hz, 1H).  $^{13}C$  NMR (151 MHz, DMSO-*d*<sub>6</sub>)  $\delta$  162.4, 161.3, 160.8, 136.6, 132.5, 131.8, 131.7, 128.0, 127.2, 126.5, 125.8, 124.1, 116.3, 115.5, 115.4.  $^{19}F$  NMR (376 MHz, DMSO)  $\delta$  -114.24. HRMS (ESI): calc. for  $C_{15}H_{11}FNO$   $[M+H]^+$ : 240.0819, found: 240.0818.

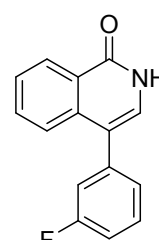 4-(3-fluorophenyl)isoquinolin-1(2H)-one (**3ak**), white solid,  $R_f$  = 0.4 (25% ethyl acetate in petroleum), 61% isolated yield.  $^1H$  NMR (600 MHz, Chloroform-*d*)  $\delta$  11.52 (s, 1H), 8.52 (d,  $J$  = 7.6 Hz, 1H), 7.67 (t,  $J$  = 6.9 Hz, 1H), 7.61 (d,  $J$  = 7.8 Hz, 1H), 7.56 (t,  $J$  = 6.8 Hz, 1H), 7.44 (q,  $J$  = 6.1 Hz, 1H), 7.21 (d,  $J$  = 7.4 Hz, 1H), 7.19 (s, 1H), 7.17 – 7.10 (m, 2H).  $^{13}C$  NMR (151 MHz, Chloroform-*d*)  $\delta$  162.8, 162.6, 161.0, 137.5, 137.5, 135.9, 131.8, 129.2, 129.2, 126.8, 126.0, 125.8, 124.8, 124.7, 124.7, 123.7, 118.0, 116.0, 115.9, 113.7, 113.6.  $^{19}F$  NMR (376 MHz, DMSO)  $\delta$  -113.52. HRMS (ESI): calc. for  $C_{15}H_{11}FNO$   $[M+H]^+$ : 240.0819, found: 240.0814.

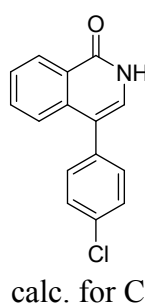
 4-(4-chlorophenyl)isoquinolin-1(2H)-one (**3al**), white solid,  $R_f = 0.4$  (25% ethyl acetate in petroleum), 67% isolated yield.  $^1\text{H}$  NMR (600 MHz, DMSO)  $\delta$  11.54 (s, 1H), 8.30 (t,  $J = 11.0$  Hz, 1H), 7.71 (t,  $J = 7.6$  Hz, 1H), 7.57 – 7.53 (m, 3H), 7.48 (d,  $J = 8.5$  Hz, 1H), 7.47 – 7.45 (m, 2H), 7.14 (d,  $J = 5.3$  Hz, 1H).  $^{13}\text{C}$  NMR (151 MHz, DMSO)  $\delta$  161.3, 136.3, 135.1, 132.6, 131.6, 128.6, 128.2, 128.1, 127.4, 127.3, 126.6, 124.0, 116.1. HRMS (ESI): calc. for  $\text{C}_{15}\text{H}_{11}\text{ClNO}$   $[\text{M}+\text{H}]^+$ : 256.0524, found: 256.0541.

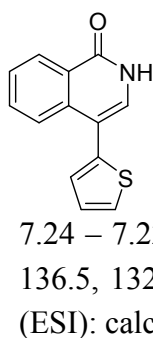
 4-(thiophen-2-yl)isoquinolin-1(2H)-one (**3am**), white solid,  $R_f = 0.4$  (50% DCM in petroleum), 64% isolated yield.  $^1\text{H}$  NMR (600 MHz, DMSO- $d_6$ )  $\delta$  11.56 (s, 1H), 8.29 (d,  $J = 7.8$  Hz, 1H), 7.76 (d,  $J = 3.4$  Hz, 2H), 7.64 (d,  $J = 5.1$  Hz, 1H), 7.57 (dt,  $J = 8.0, 4.1$  Hz, 1H), 7.26 (d,  $J = 4.6$  Hz, 1H), 7.24 – 7.22 (m, 1H), 7.22 – 7.18 (m, 1H).  $^{13}\text{C}$  NMR (151 MHz, DMSO- $d_6$ )  $\delta$  161.1, 136.5, 132.8, 129.1, 127.7, 127.5, 127.2, 126.8, 126.1, 125.7, 124.1, 109.93. HRMS (ESI): calc. for  $\text{C}_{13}\text{H}_{10}\text{NOS}$   $[\text{M}+\text{H}]^+$ : 228.0478, found: 228.0475

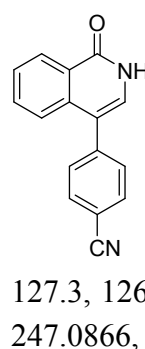
 4-(1-oxo-1,2-dihydroisoquinolin-4-yl)benzonitrile (**3an**), white solid,  $R_f = 0.4$  (50% DCM in petroleum), 45% isolated yield.  $^1\text{H}$  NMR (600 MHz, DMSO- $d_6$ )  $\delta$  11.64 (s, 1H), 8.31 (d,  $J = 7.9$  Hz, 1H), 7.96 (d,  $J = 7.6$  Hz, 2H), 7.73 (t,  $J = 7.4$  Hz, 1H), 7.67 (d,  $J = 7.7$  Hz, 2H), 7.57 (t,  $J = 7.5$  Hz, 1H), 7.50 (d,  $J = 8.1$  Hz, 1H), 7.23 (d,  $J = 5.4$  Hz, 1H).  $^{13}\text{C}$  NMR (101 MHz, DMSO- $d_6$ )  $\delta$  161.8, 141.9, 136.2, 133.2, 133.1, 131.2, 129.5, 127.9, 127.3, 126.3, 124.3, 119.3, 116.4, 110.5. HRMS (ESI): calc. for  $\text{C}_{16}\text{H}_{11}\text{N}_2\text{O}$   $[\text{M}+\text{H}]^+$ : 247.0866, found: 247.0866

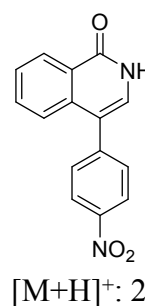
 4-(4-nitrophenyl)isoquinolin-1(2H)-one (**3ao**), white solid,  $R_f = 0.4$  (25% ethyl acetate in petroleum), 32% isolated yield.  $^1\text{H}$  NMR (400 MHz, DMSO)  $\delta$  11.69 (s, 1H), 8.35 (d,  $J = 7.2$  Hz, 3H), 7.76 (d,  $J = 8.1$  Hz, 3H), 7.58 (dd,  $J = 18.7, 7.6$  Hz, 2H), 7.30 (d,  $J = 4.9$  Hz, 1H).  $^{13}\text{C}$  NMR (126 MHz, DMSO- $d_6$ )  $\delta$  161.8, 147.0, 144.0, 136.1, 133.3, 131.4, 129.8, 128.7, 127.9, 127.4, 126.3, 124.3, 115.9. HRMS (ESI): calc. for  $\text{C}_{15}\text{H}_{11}\text{N}_2\text{O}_3$   $[\text{M}+\text{H}]^+$ : 267.0764, found: 267.0765.

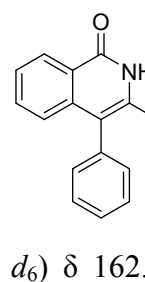
 3-methyl-4-phenylisoquinolin-1(2H)-one (**3ap**), white solid,  $R_f = 0.5$  (18% ethyl acetate in petroleum), 42% isolated yield.  $^1\text{H}$  NMR (600 MHz, DMSO- $d_6$ )  $\delta$  11.45 (s, 1H), 8.23 (d,  $J = 8.0$  Hz, 1H), 7.57 (t,  $J = 7.6$  Hz, 1H), 7.51 (t,  $J = 7.1$  Hz, 2H), 7.43 (q,  $J = 7.5$  Hz, 2H), 7.28 (d,  $J = 7.4$  Hz, 2H), 6.99 (d,  $J = 8.1$  Hz, 1H), 2.01 (s, 3H).  $^{13}\text{C}$  NMR (101 MHz, DMSO- $d_6$ )  $\delta$  162.2, 138.8, 136.7, 136.0, 132.8, 131.4, 129.2, 127.9, 127.2, 125.8, 124.8,

124.7, 115.1, 17.8. HRMS (ESI): calc. for C<sub>16</sub>H<sub>14</sub>NO [M+H]<sup>+</sup>: 236.1060, found: 236.1071.

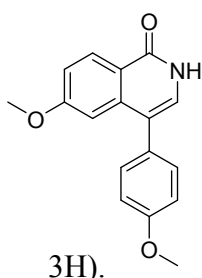

5-methoxy-4-(4-methoxyphenyl)isoquinolin-1(2H)-one (**3ba**), white solid, R<sub>f</sub> = 0.4 (25% ethyl acetate in petroleum), 76% isolated yield. <sup>1</sup>H NMR (600 MHz, DMSO-*d*<sub>6</sub>) δ 11.25 (d, *J* = 4.8 Hz, 1H), 8.21 (d, *J* = 8.8 Hz, 1H), 7.37 (d, *J* = 7.3 Hz, 2H), 7.14 (d, *J* = 8.9 Hz, 1H), 7.05 (d, *J* = 7.4 Hz, 2H), 7.01 (d, *J* = 5.4 Hz, 1H), 6.88 (s, 1H), 3.82 (s, 3H), 3.76 (s, 3H). <sup>13</sup>C NMR (151 MHz, DMSO) δ 162.2, 160.9, 158.6, 138.9, 130.7, 129.4, 128.4, 128.2, 119.6, 116.7, 115.0, 114.1, 106.1, 55.2, 55.1. HRMS (ESI): calc. for C<sub>17</sub>H<sub>16</sub>NO<sub>3</sub> [M+H]<sup>+</sup>: 282.1125, found: 282.1125.

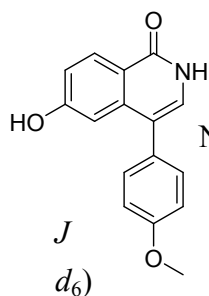

6-hydroxy-4-(4-methoxyphenyl)isoquinolin-1(2H)-one (**3ca**), white solid, R<sub>f</sub> = 0.3 (25% ethyl acetate in petroleum), 72% isolated yield. <sup>1</sup>H NMR (600 MHz, DMSO-*d*<sub>6</sub>) δ 11.09 (s, -1H), 10.20 (s, -1H), 8.12 (d, *J* = 8.6 Hz, -1H), 7.31 (d, *J* = 7.0 Hz, -2H), 7.05 (d, *J* = 7.1 Hz, -2H), 6.94 (d, *J* = 7.1 Hz, -2H), 6.79 (s, -1H), 3.81 (s, -4H). <sup>13</sup>C NMR (151 MHz, DMSO-*d*<sub>6</sub>) δ 161.0, 160.9, 158.5, 139.2, 130.8, 129.5, 128.7, 127.7, 118.5, 116.6, 116.0, 114.0, 108.1, 55.1. HRMS (ESI): calc. for C<sub>17</sub>H<sub>16</sub>NO<sub>3</sub> [M+H]<sup>+</sup>: 268.0968, found: 268.0971.

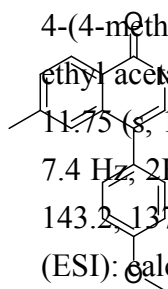

4-(4-methoxyphenyl)-6-methylisoquinolin-1(2H)-one (**3da**), white solid, R<sub>f</sub> = 0.4 (25% ethyl acetate in petroleum), 67% isolated yield. <sup>1</sup>H NMR (600 MHz, Chloroform-*d*) δ 11.75 (s, 1H), 8.39 (d, *J* = 7.9 Hz, 1H), 7.39 – 7.32 (m, 4H), 7.13 (s, 1H), 7.02 (d, *J* = 7.4 Hz, 2H), 3.89 (s, 3H), 2.43 (s, 3H). <sup>13</sup>C NMR (151 MHz, Chloroform-*d*) δ 159.1, 143.2, 137.9, 131.1, 128.8, 128.4, 127.6, 126.7, 124.7, 119.6, 114.1, 55.4, 22.1. HRMS (ESI): calc. for C<sub>17</sub>H<sub>16</sub>NO<sub>2</sub> [M+H]<sup>+</sup>: 266.1176, found: 266.1178.

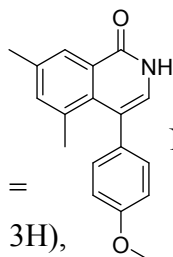

4-(4-methoxyphenyl)-5,7-dimethylisoquinolin-1(2H)-one (**3ea**), white solid, R<sub>f</sub> = 0.4 (25% ethyl acetate in petroleum), 63% isolated yield. <sup>1</sup>H NMR (600 MHz, Chloroform-*d*) δ 11.42 (s, 1H), 8.24 (s, 1H), 7.20 (d, *J* = 8.1 Hz, 2H), 6.96 (s, 1H), 6.91 (d, *J* = 8.2 Hz, 2H), 3.87 (s, 3H), 2.45 (s, 3H), 1.91 (s, 3H). <sup>13</sup>C NMR (151 MHz, Chloroform-*d*) δ 158.9, 137.9, 136.5, 134.9, 134.0, 132.7, 131.2, 127.1, 125.7, 119.7, 113.4, 55.3, 23.8, 21.1. HRMS (ESI): calc. for C<sub>18</sub>H<sub>18</sub>NO<sub>2</sub> [M+Na]<sup>+</sup>: 302.1151, found: 302.1170.

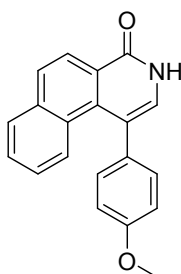

1-(4-methoxyphenyl)benzo[f]isoquinolin-4(3H)-one (**3fa**), white solid, R<sub>f</sub> = 0.4 (25% ethyl acetate in petroleum), 69% isolated yield. <sup>1</sup>H

NMR (600 MHz, DMSO-*d*<sub>6</sub>)  $\delta$  11.81 (s, 1H), 8.32 (d, *J* = 8.7 Hz, 1H), 8.00 (d, *J* = 8.0 Hz, 1H), 7.96 (d, *J* = 8.7 Hz, 1H), 7.64 (d, *J* = 8.8 Hz, 1H), 7.56 (t, *J* = 7.4 Hz, 1H), 7.27 (d, *J* = 8.1 Hz, 2H), 7.22 – 7.17 (m, 1H), 7.12 (s, 1H), 7.04 (d, *J* = 8.1 Hz, 2H), 3.84 (s, 3H). <sup>13</sup>C NMR (101 MHz, DMSO-*d*<sub>6</sub>)  $\delta$  161.7, 159.0, 136.2, 135.7, 133.2, 131.6, 131.0, 129.3, 128.9, 128.3, 128.0, 127.7, 125.7, 124.9, 123.7, 117.6, 114.9, 55.7. HRMS (ESI): calc. for C<sub>20</sub>H<sub>16</sub>NO<sub>2</sub> [M+H]<sup>+</sup>: 302.1176, found: 302.1186.

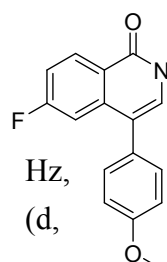 6-fluoro-4-(4-methoxyphenyl)isoquinolin-1(2H)-one (**3ga**), white solid, R<sub>f</sub> = 0.4 (50% DCM in petroleum), 65% isolated yield. <sup>1</sup>H NMR (400 MHz, DMSO-*d*<sub>6</sub>)  $\delta$  11.52 (s, 1H), 8.42 – 8.31 (m, 1H), 7.95 (d, *J* = 6.0 Hz, 1H), 7.39 (d, *J* = 8.8 Hz, 1H), 7.35 (d, *J* = 7.8 Hz, 2H), 7.12 (s, 1H), 7.06 (d, *J* = 7.8 Hz, 2H), 3.81 (s, 3H). <sup>13</sup>C NMR (101 MHz, DMSO-*d*<sub>6</sub>)  $\delta$  163.8, 161.1, 159.3, 131.3, 130.6, 130.5, 129.5, 128.2, 123.2, 117.0, 115.7, 115.5, 115.2, 114.7, 109.8, 109.6, 55.6. <sup>19</sup>F NMR (376 MHz, DMSO)  $\delta$  -105.72. HRMS (ESI): calc. for C<sub>16</sub>H<sub>13</sub>FNO<sub>2</sub> [M+H]<sup>+</sup>: 270.0925, found: 270.0931.

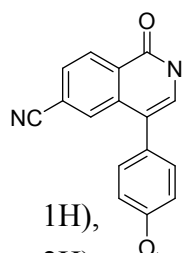 4-(4-methoxyphenyl)-1-oxo-1,2-dihydroisoquinoline-6-carbonitrile (**3ha**), white solid, R<sub>f</sub> = 0.4 (25% ethyl acetate in petroleum), 49% isolated yield. <sup>1</sup>H NMR (600 MHz, DMSO-*d*<sub>6</sub>)  $\delta$  11.85 (s, 1H), 8.61 (s, 1H), 8.03 (d, *J* = 8.4 Hz, 1H), 7.60 (d, *J* = 8.4 Hz, 1H), 7.34 (d, *J* = 7.3 Hz, 2H), 7.27 (s, 1H), 7.06 (d, *J* = 7.3 Hz, 2H), 3.81 (s, 3H). <sup>13</sup>C NMR (151 MHz, DMSO-*d*<sub>6</sub>)  $\delta$  160.1, 158.9, 140.1, 134.3, 132.2, 131.1, 131.0, 127.2, 125.8, 125.7, 118.5, 116.6, 114.2, 108.5, 55.2. HRMS (ESI): calc. for C<sub>17</sub>H<sub>13</sub>N<sub>2</sub>O<sub>2</sub> [M+H]<sup>+</sup>: 277.0972, found: 277.0972.

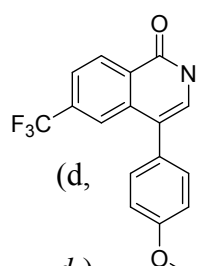 4-(4-methoxyphenyl)-6-(trifluoromethyl)isoquinolin-1(2H)-one (**3ia**), white solid, R<sub>f</sub> = 0.4 (25% ethyl acetate in petroleum), 61% isolated yield. <sup>1</sup>H NMR (600 MHz, DMSO-*d*<sub>6</sub>)  $\delta$  11.80 (s, 1H), 8.53 (s, 1H), 8.00 (d, *J* = 8.5 Hz, 1H), 7.69 (d, *J* = 8.3 Hz, 1H), 7.37 (d, *J* = 7.5 Hz, 2H), 7.25 (s, 1H), 7.07 (d, *J* = 7.3 Hz, 2H), 3.82 (s, 3H). <sup>13</sup>C NMR (151 MHz, DMSO-*d*<sub>6</sub>)  $\delta$  160.6, 158.8, 139.9, 131.0, 130.3, 128.3, 127.5, 126.0, 125.6, 124.3, 116.6, 114.2, 55.2. <sup>19</sup>F NMR (376 MHz, DMSO)  $\delta$  -60.95. HRMS (ESI): calc. for C<sub>18</sub>H<sub>13</sub>F<sub>3</sub>N<sub>2</sub>O<sub>2</sub> [M+H]<sup>+</sup>: 320.0893, found: 320.0887.

## 5. Mechanistic Studies

**Fluorescence quenching experiments:** As shown in Figure S1 a, pyridinium salt **1a** was capable of quenching the excited state of photocatalyst. The emission intensity of the solution (1 mL) of photocatalyst with different concentration of quencher **1a** (0, 0.2, 0.4, 0.6, 0.8, 1.0 mM) was collected after degassed with a nitrogen stream for 5 minutes. The Stern-Volmer plots, as depicted in Figure S1 b, indicated that pyridinium salt **1a** was able to quench the excited photocatalyst much more efficiently than alkyne **2a**.

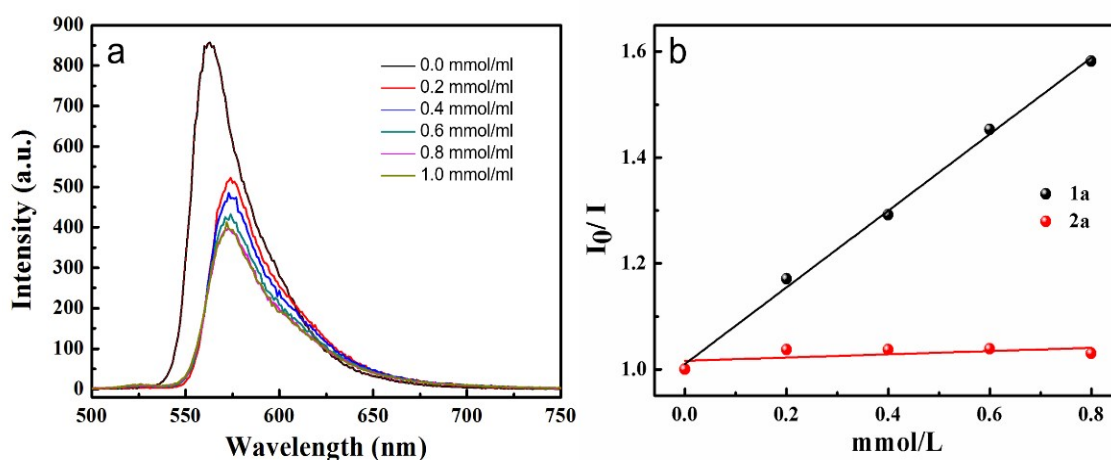

**Figure S1** a) Fluorescence spectra of a solution of photocatalyst in DMSO containing different concentration of **1a**. b) Stern-Volmer plots.  $I_0$  and  $I$  are respective luminescence intensities in the absence and presence of the indicated concentrations of the corresponding quencher: pyridinium salt **1a** and alkyne **2a**.

**Cyclic Voltammetry experiment of pyridinium salt 1a:** Further Cyclic Voltammetry (CV) test for evaluation of the redox potential of **1a** was conducted. Cyclic Voltammogram was showed as Figure S2.

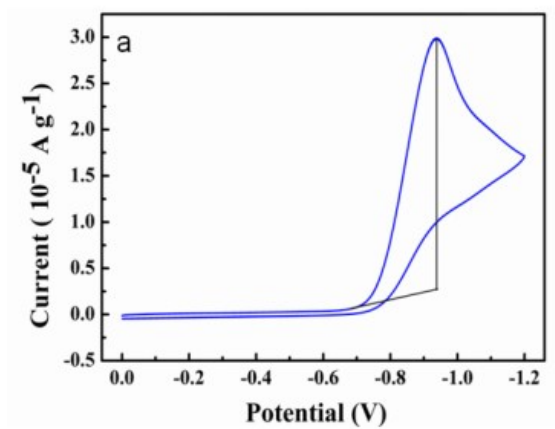

**Figure S2** Cyclic Voltammogram of pyridinium salt **1a**.

## 6. NMR Spectra

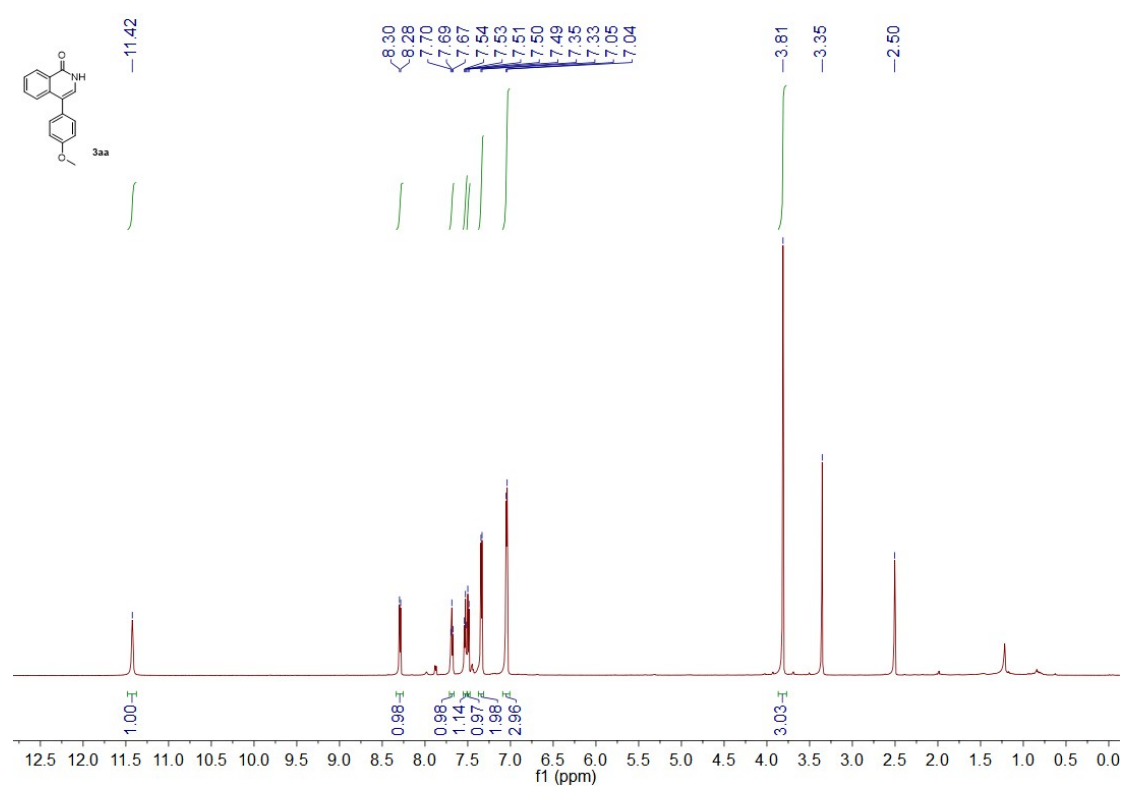

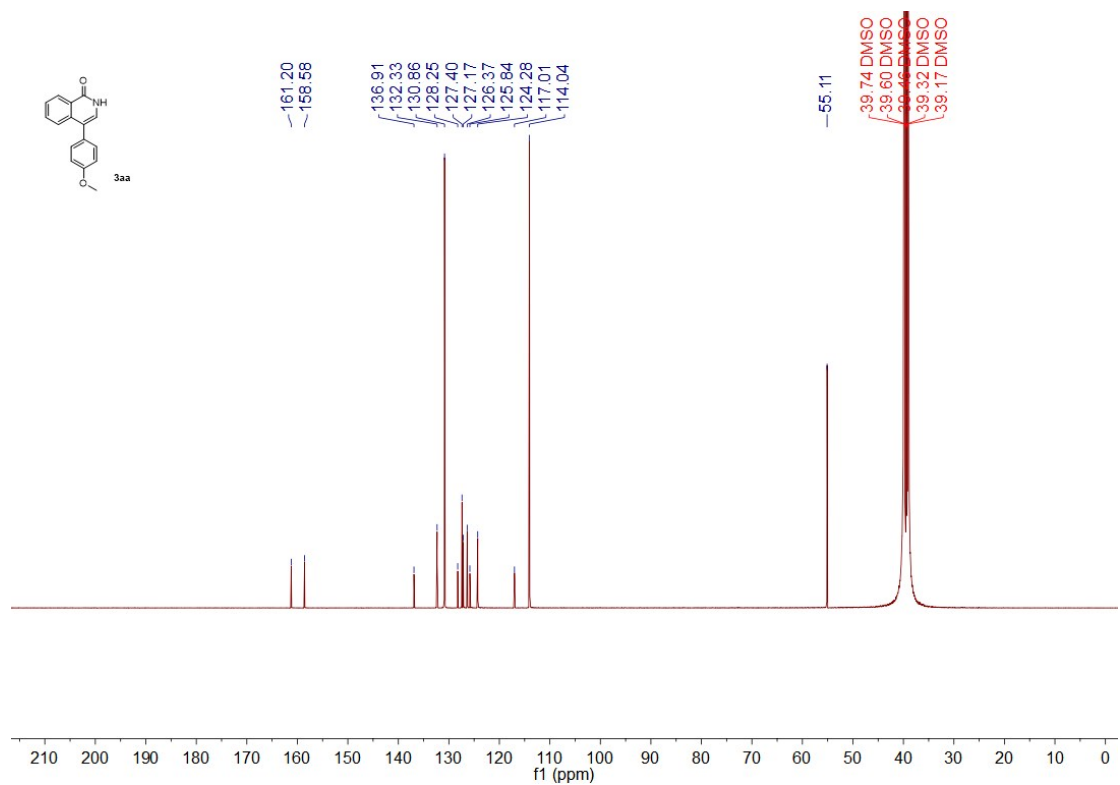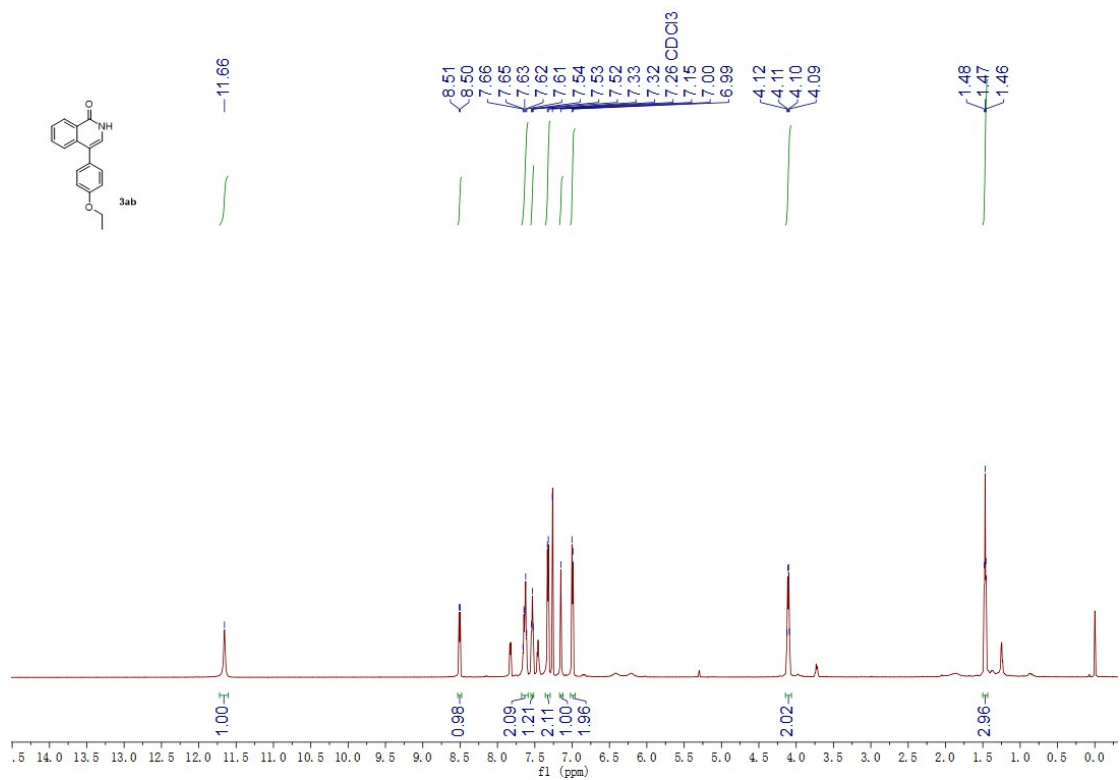

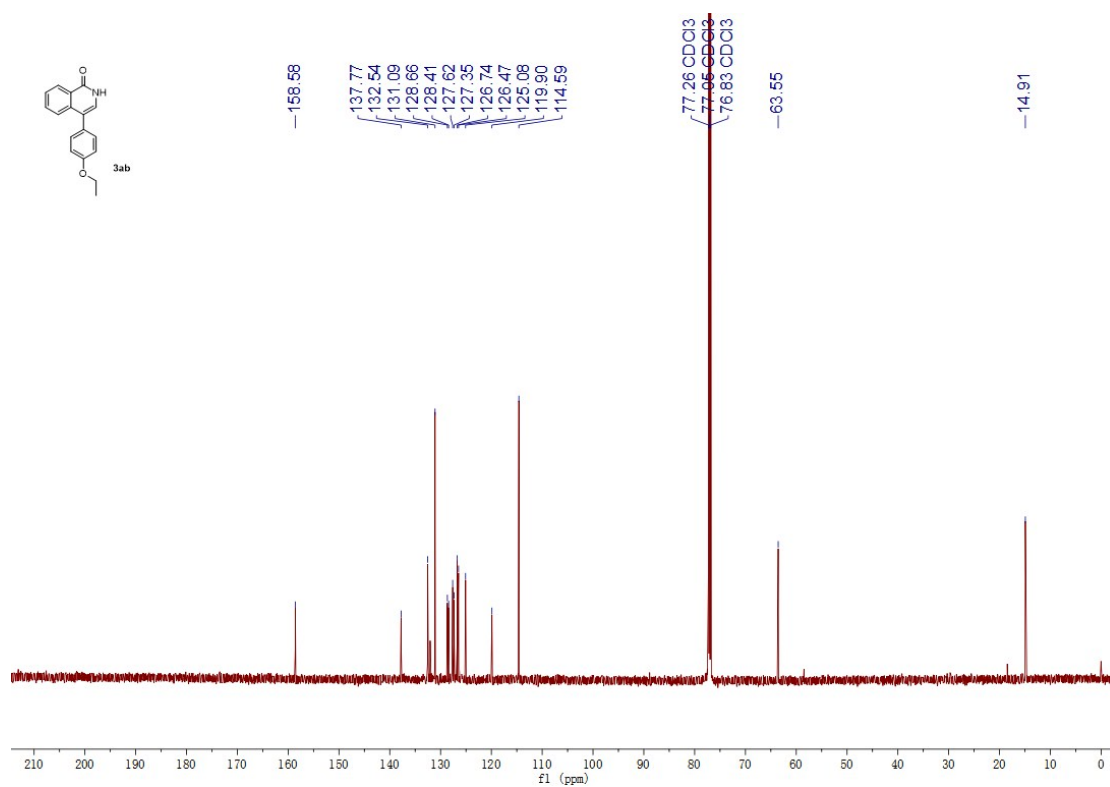

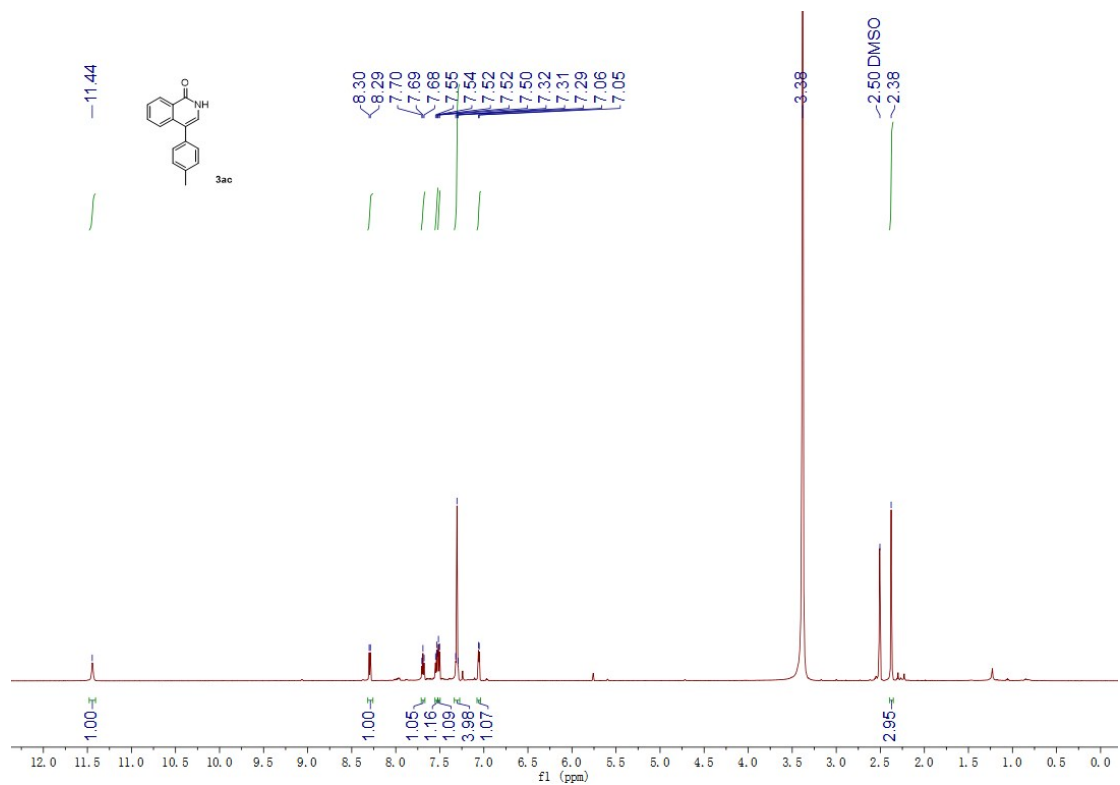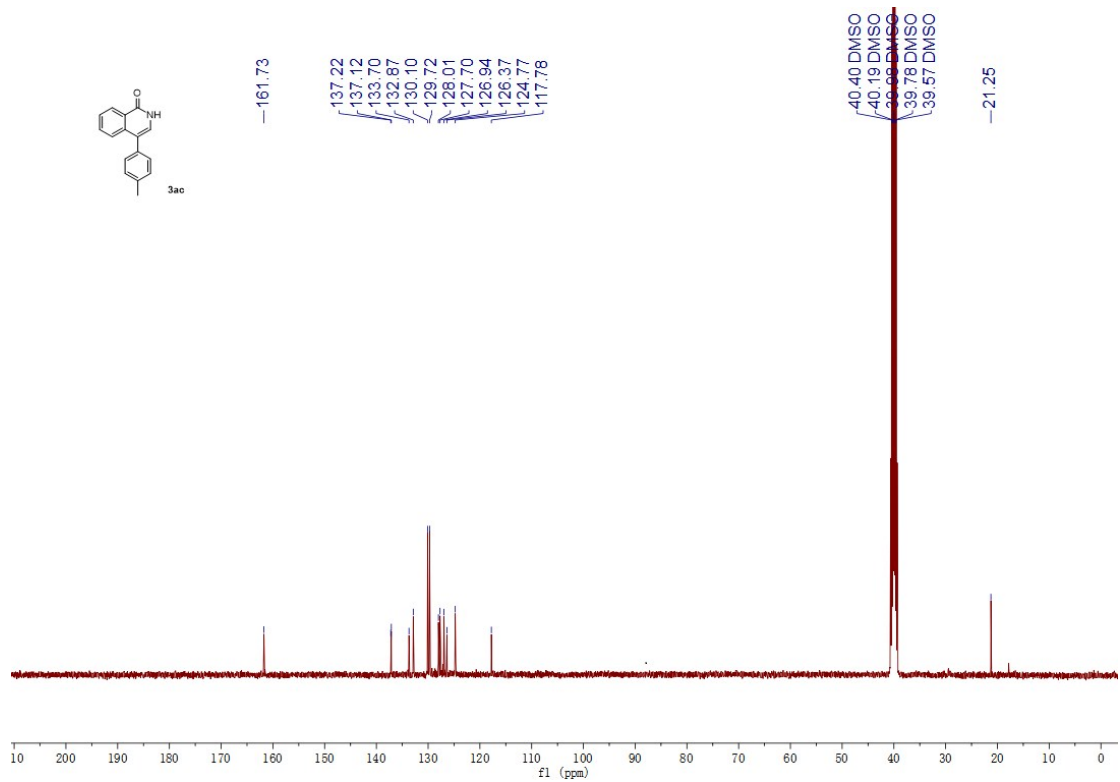

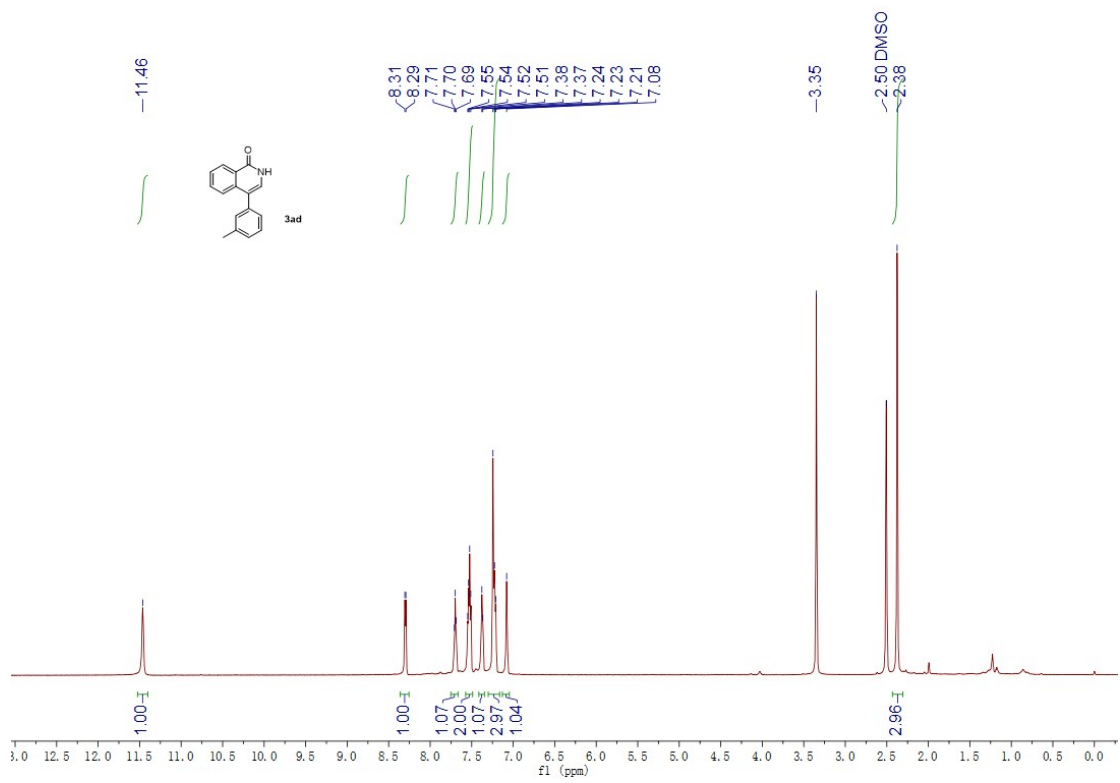

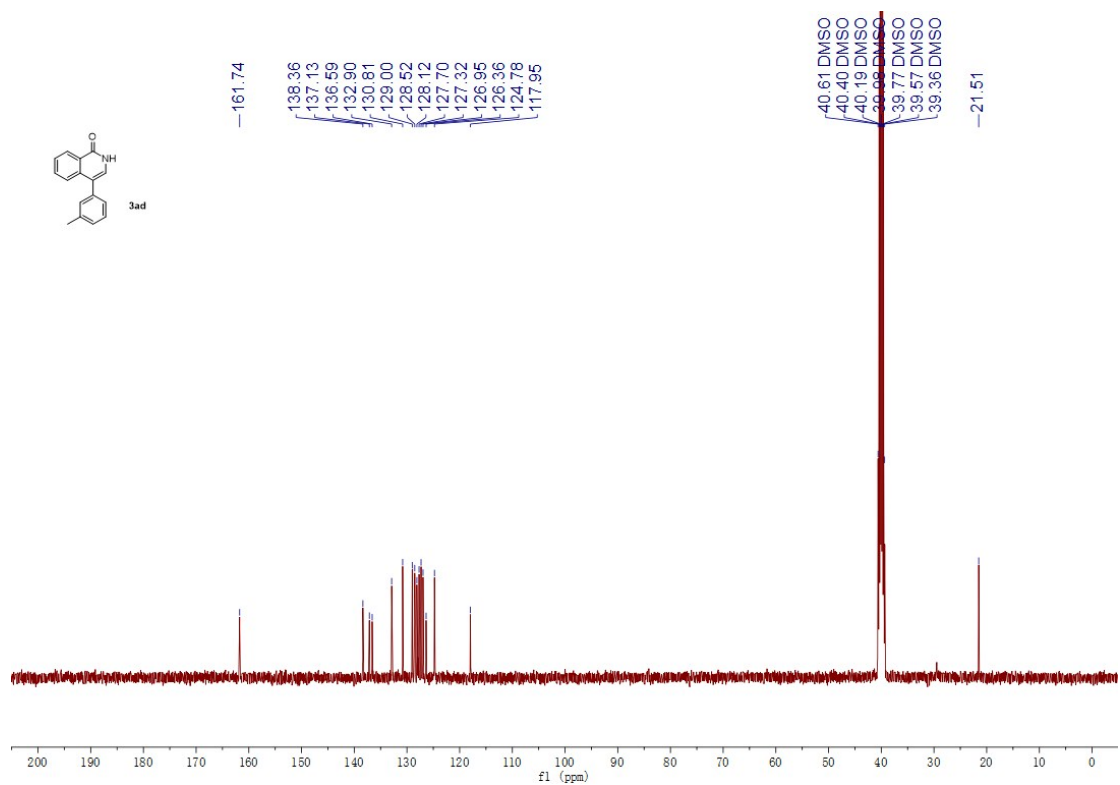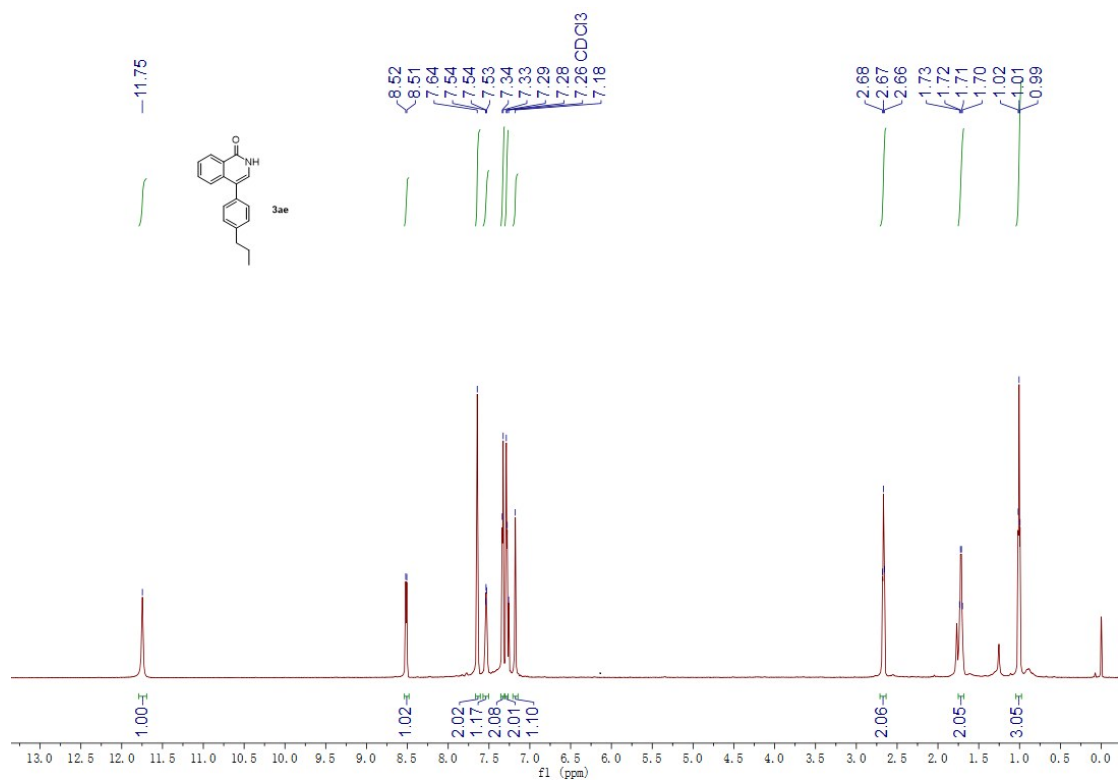

SOC 190409-1 13C

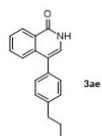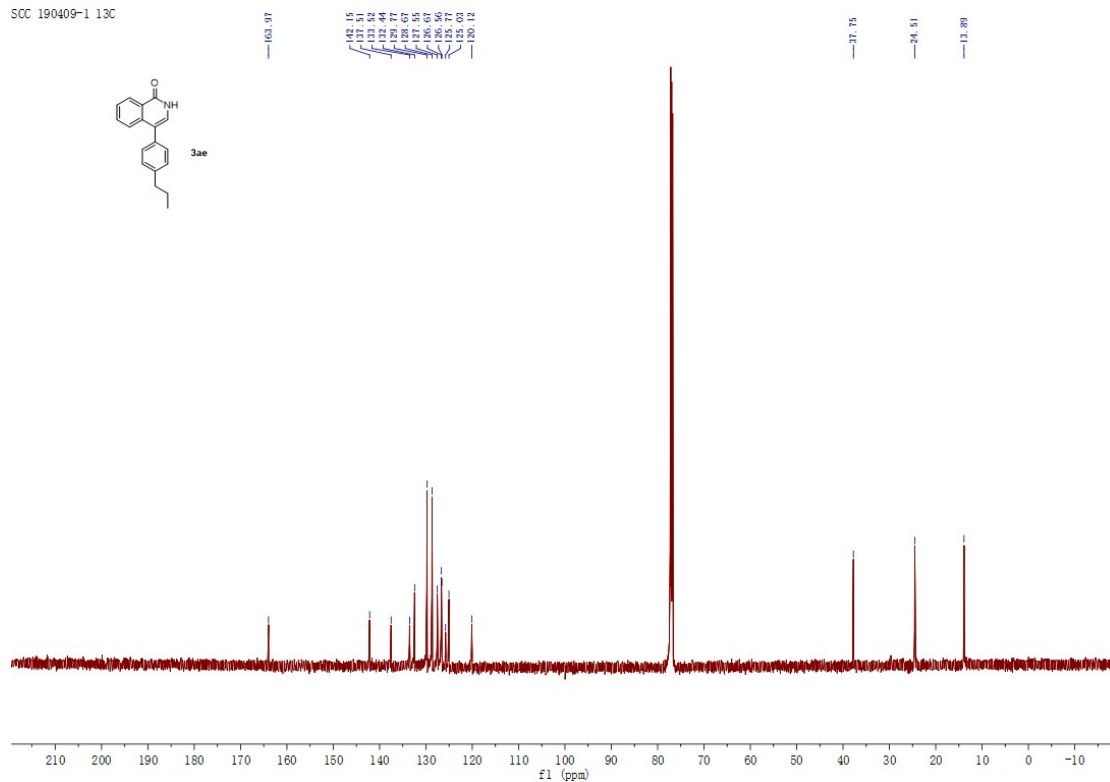

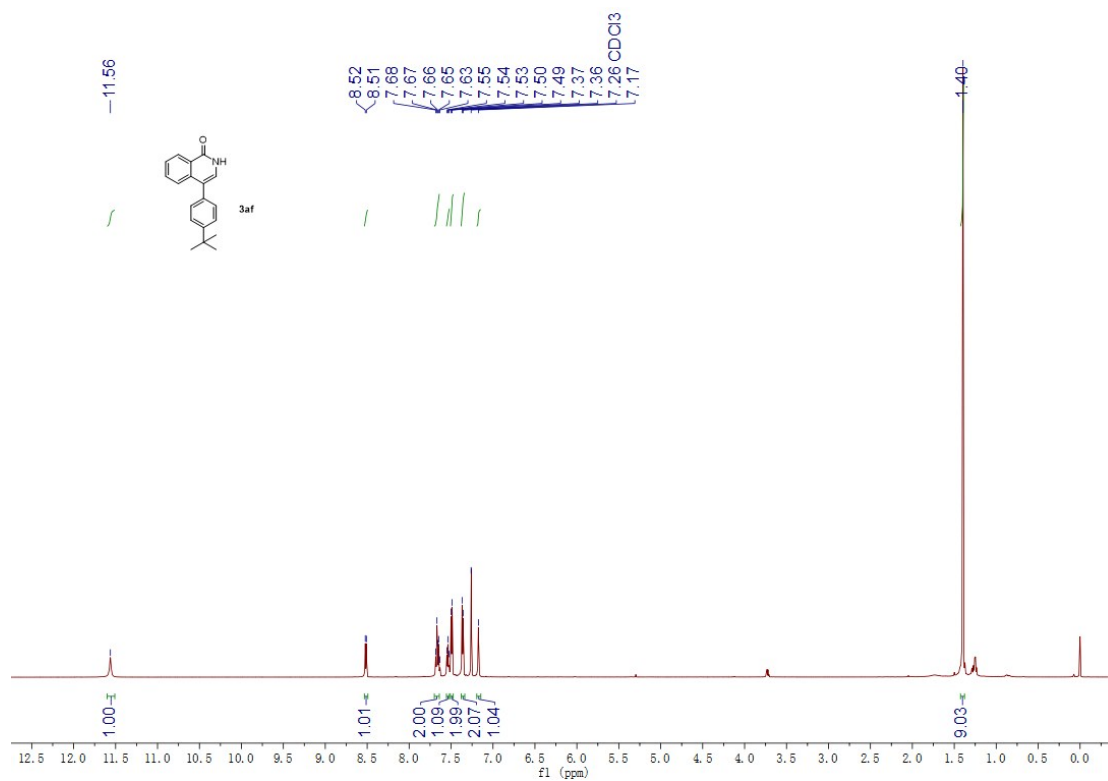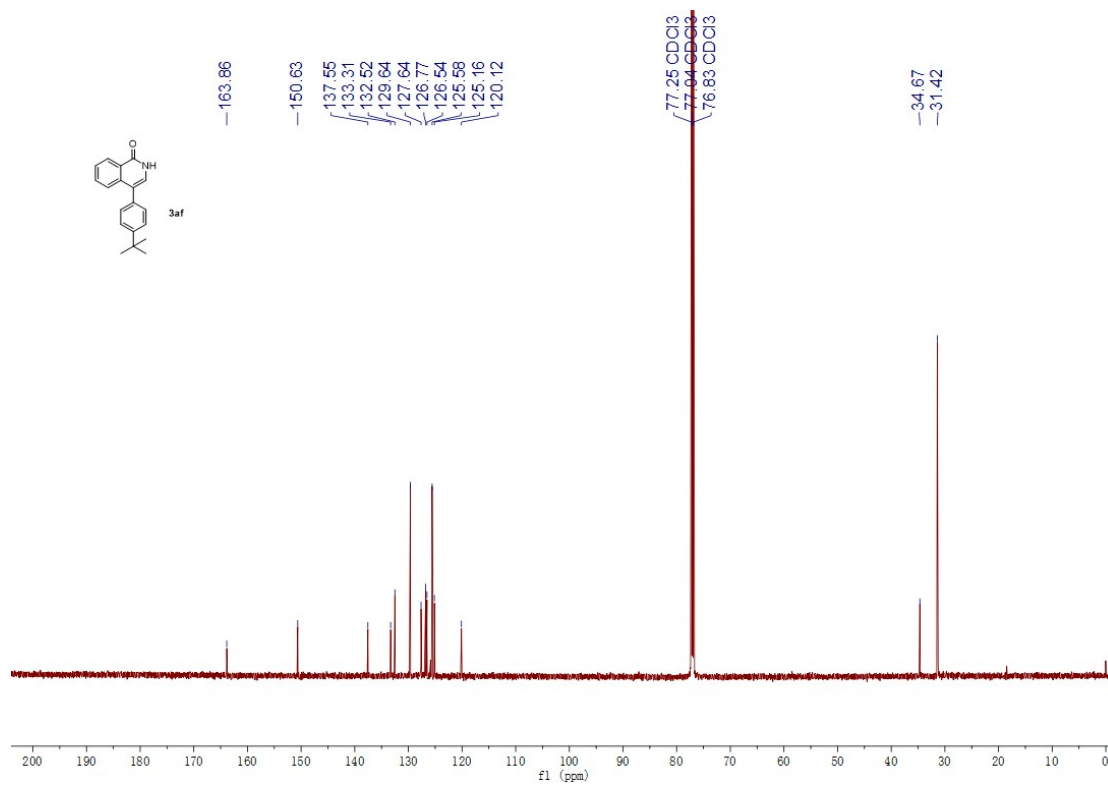

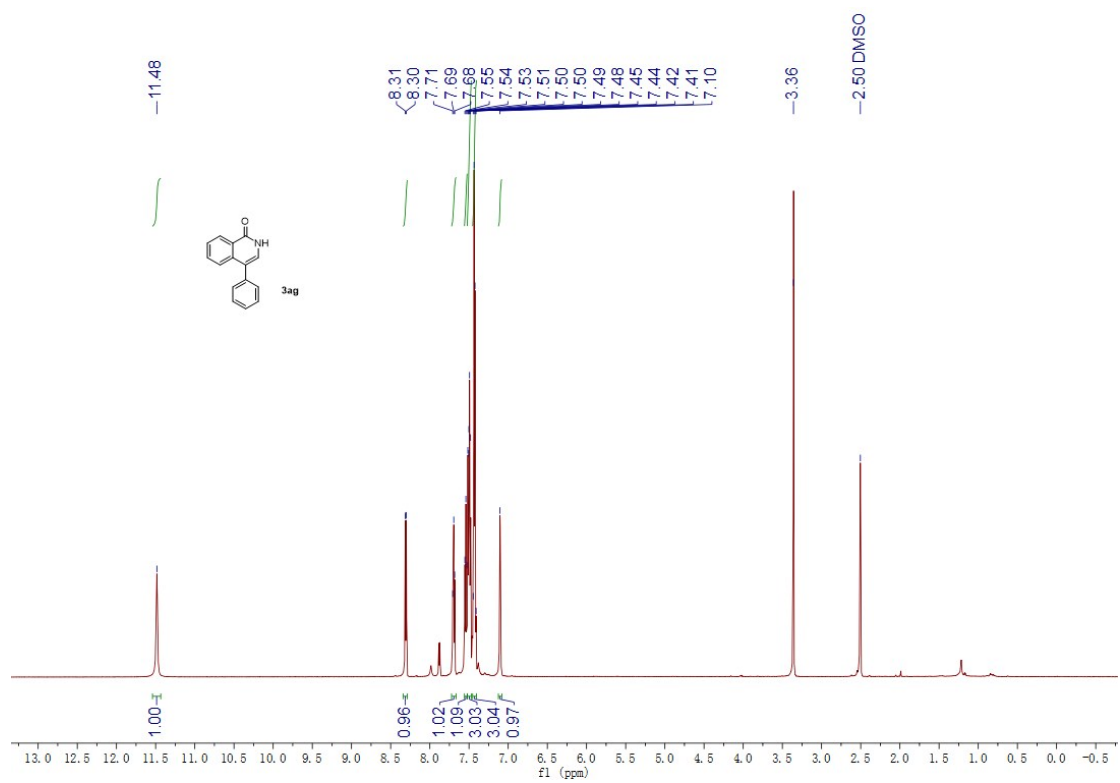

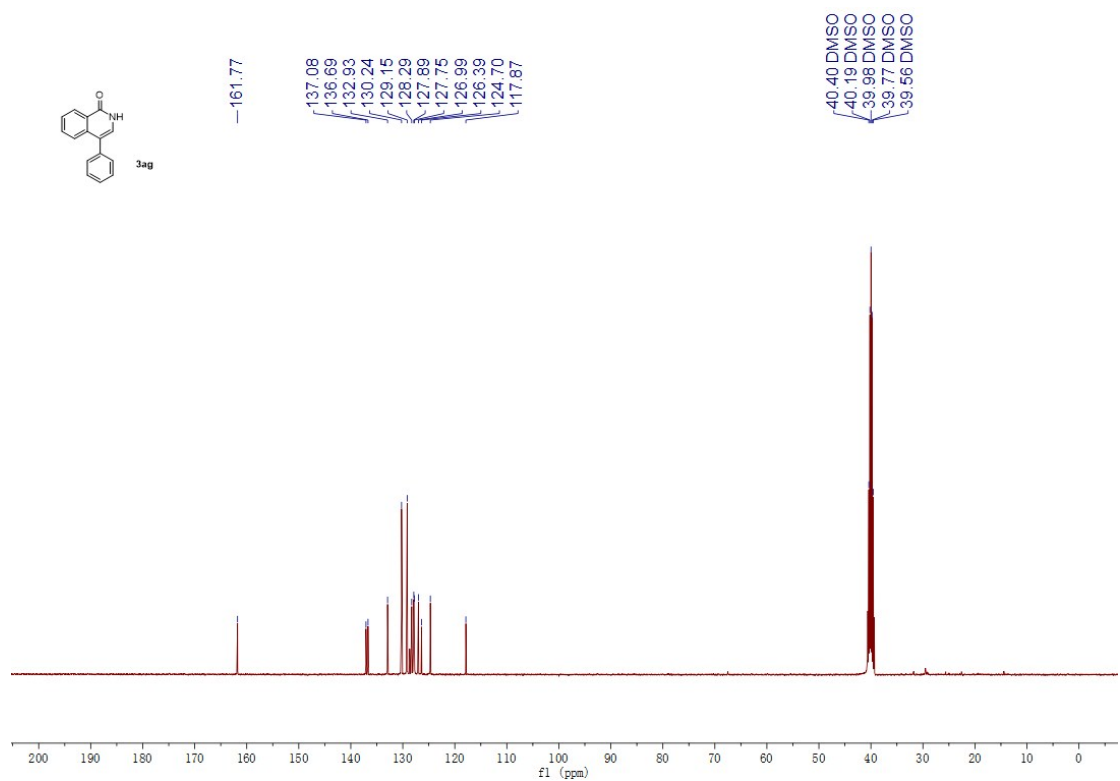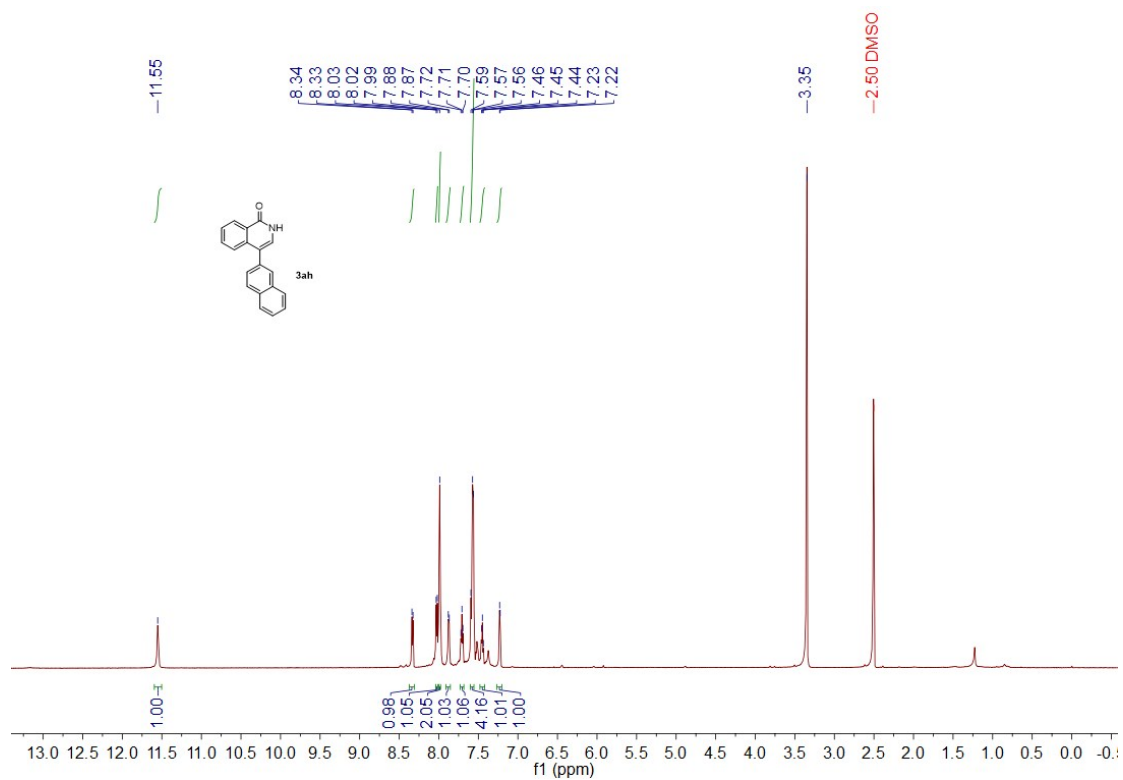

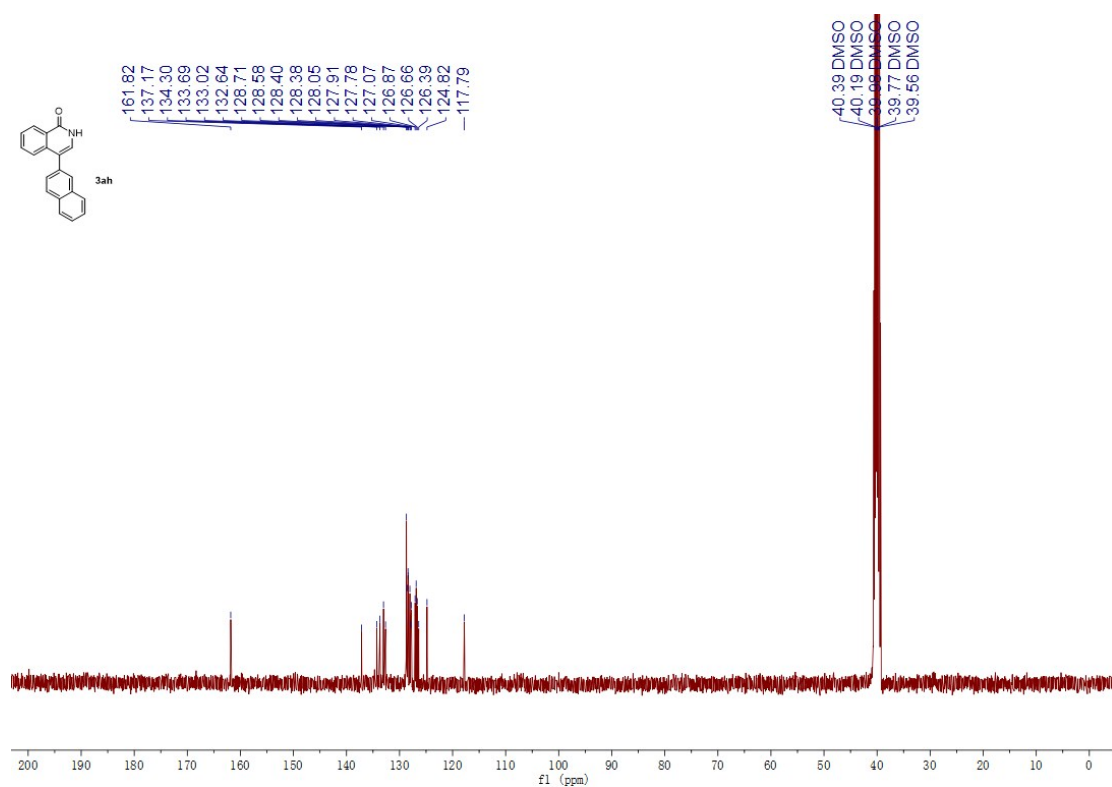

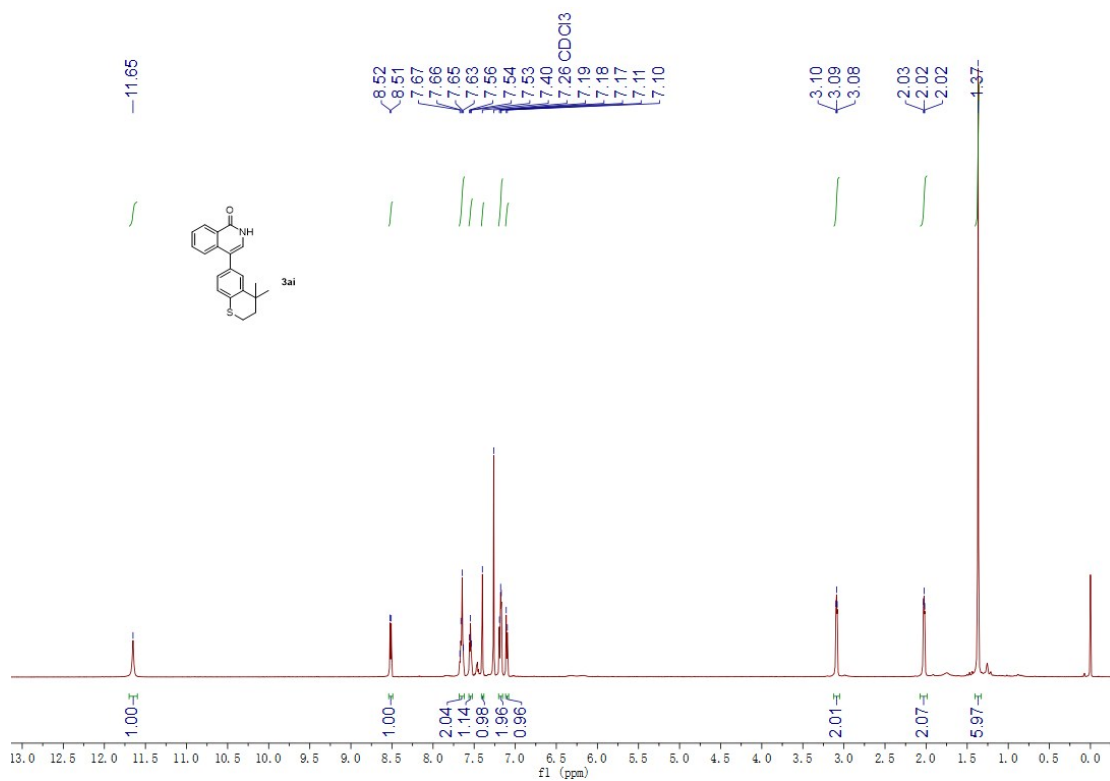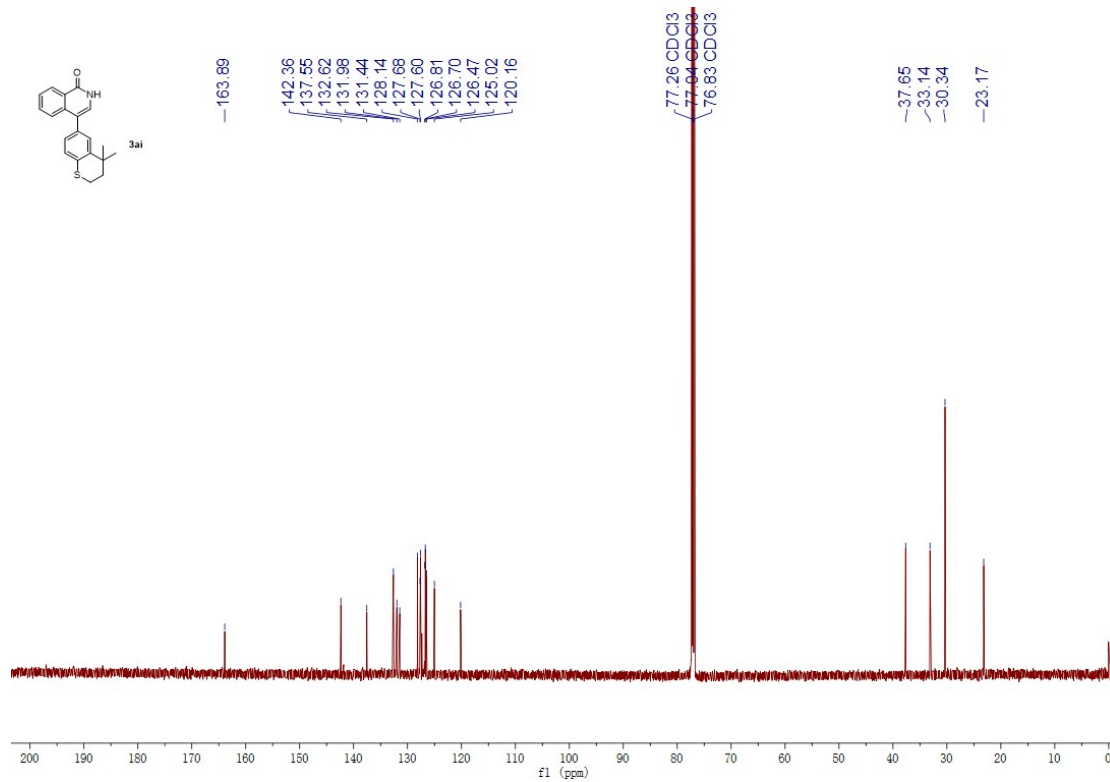

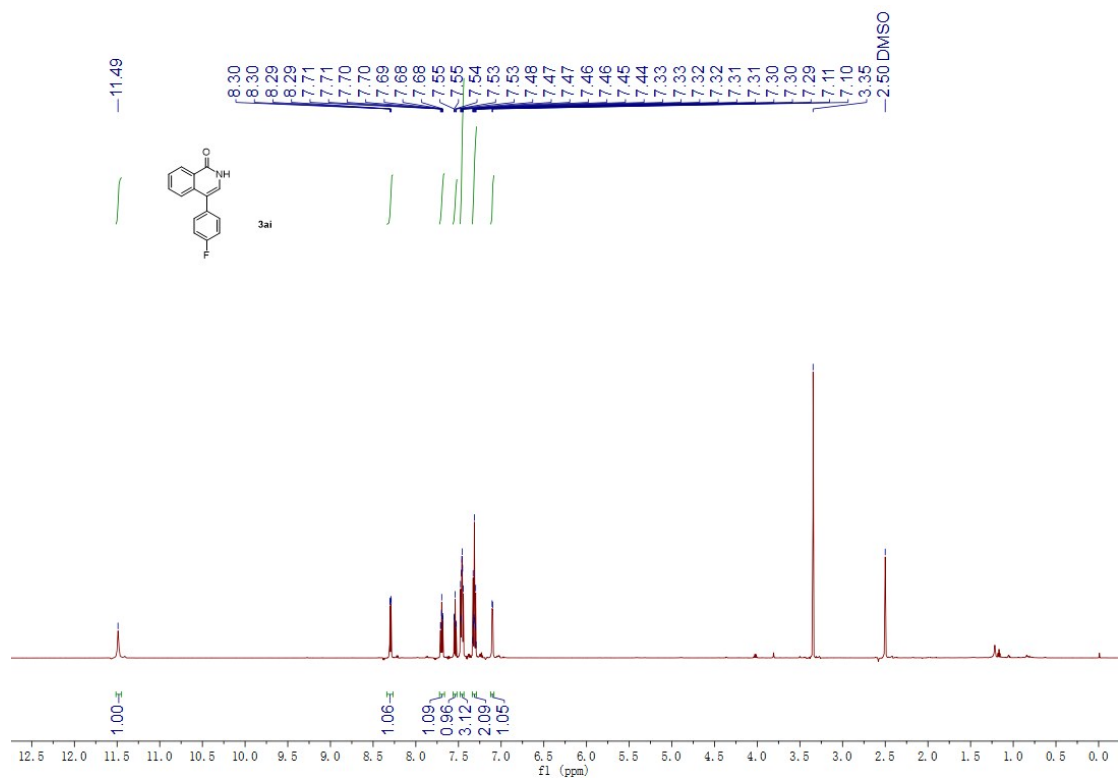

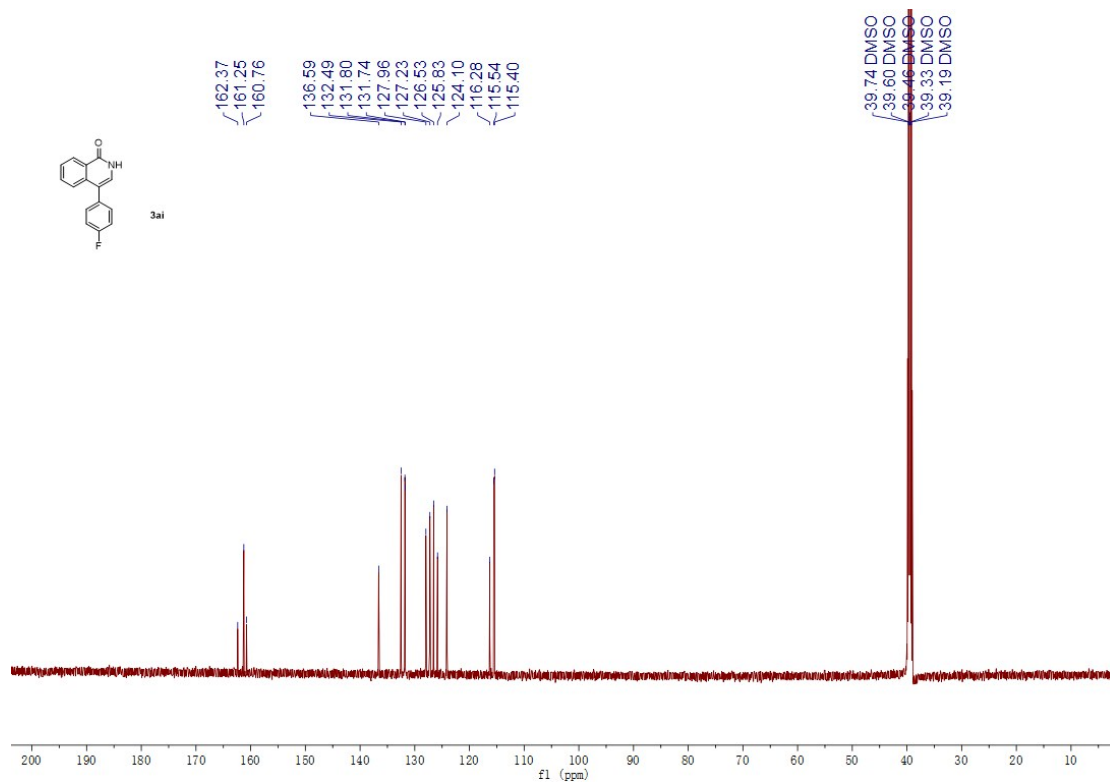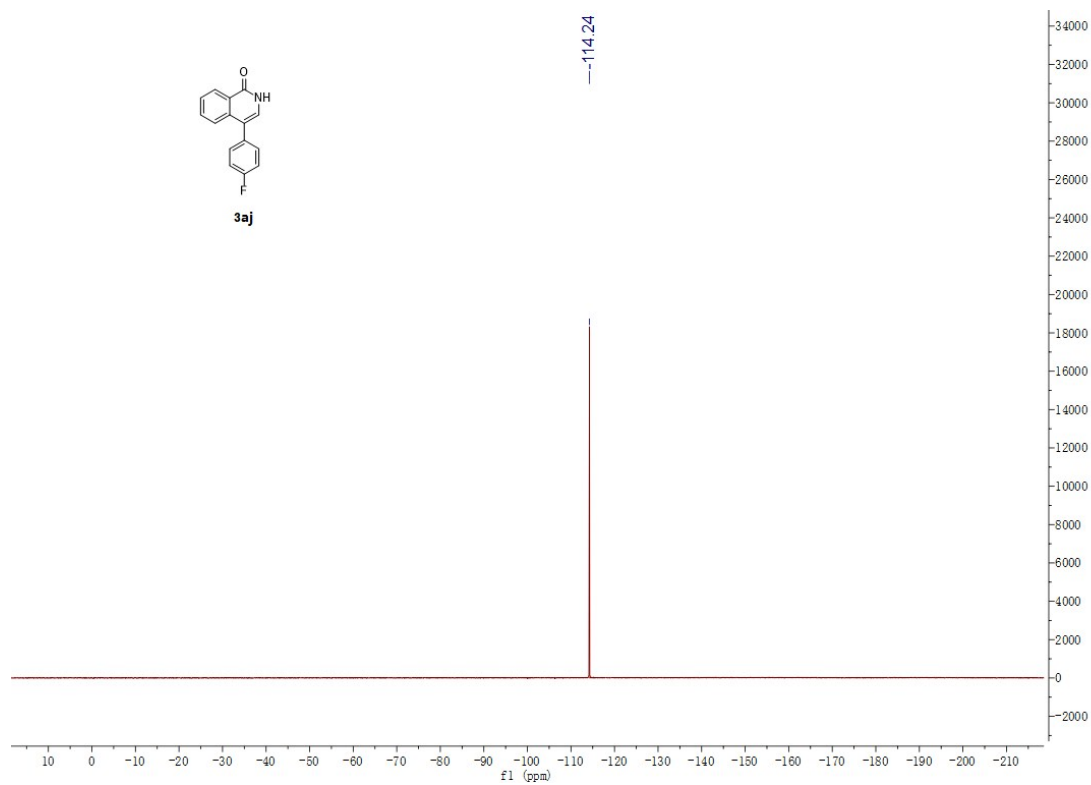

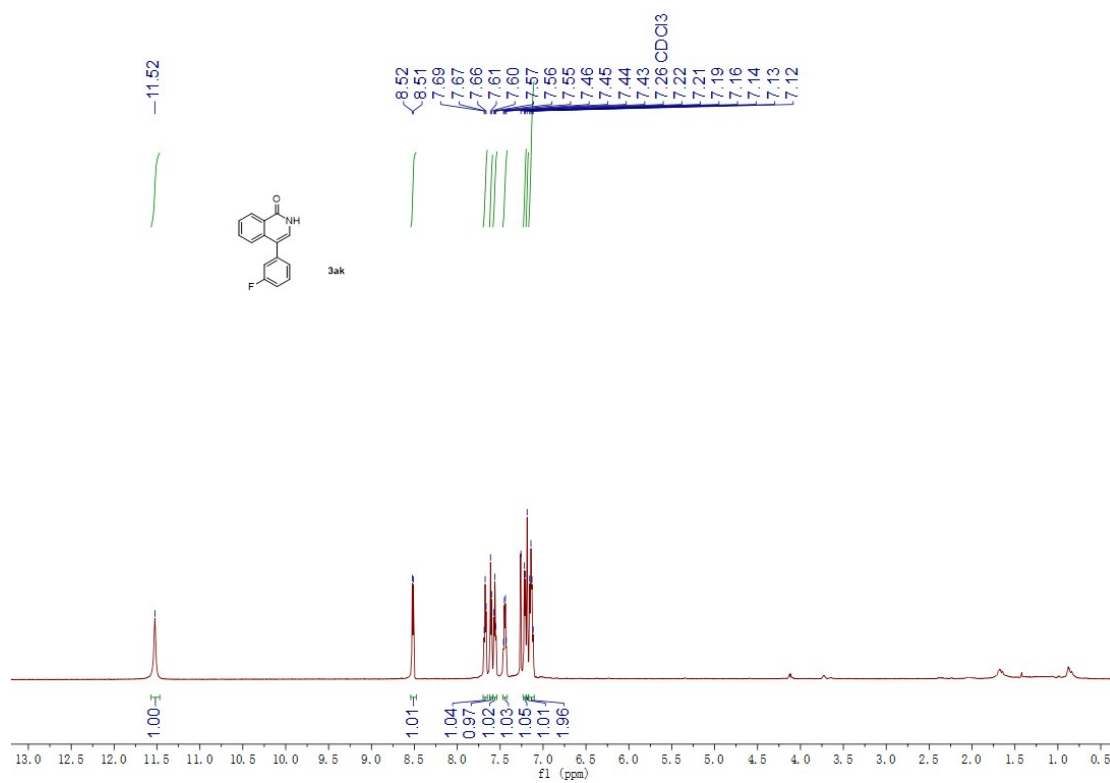

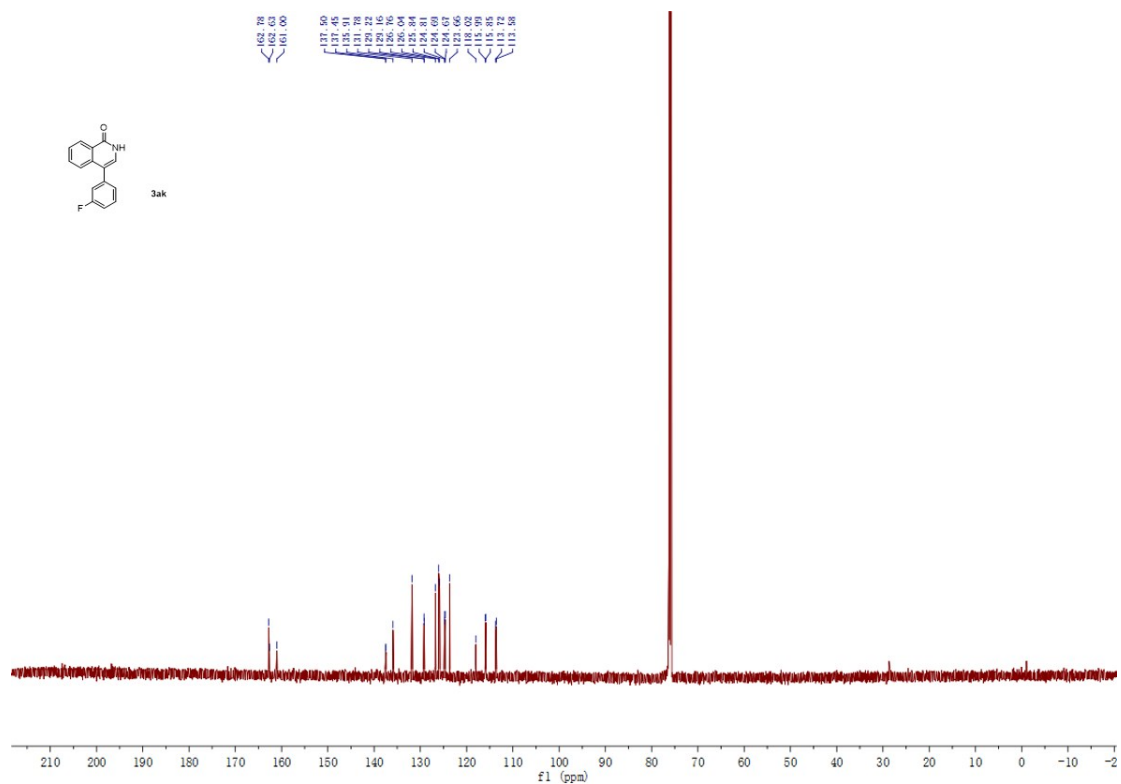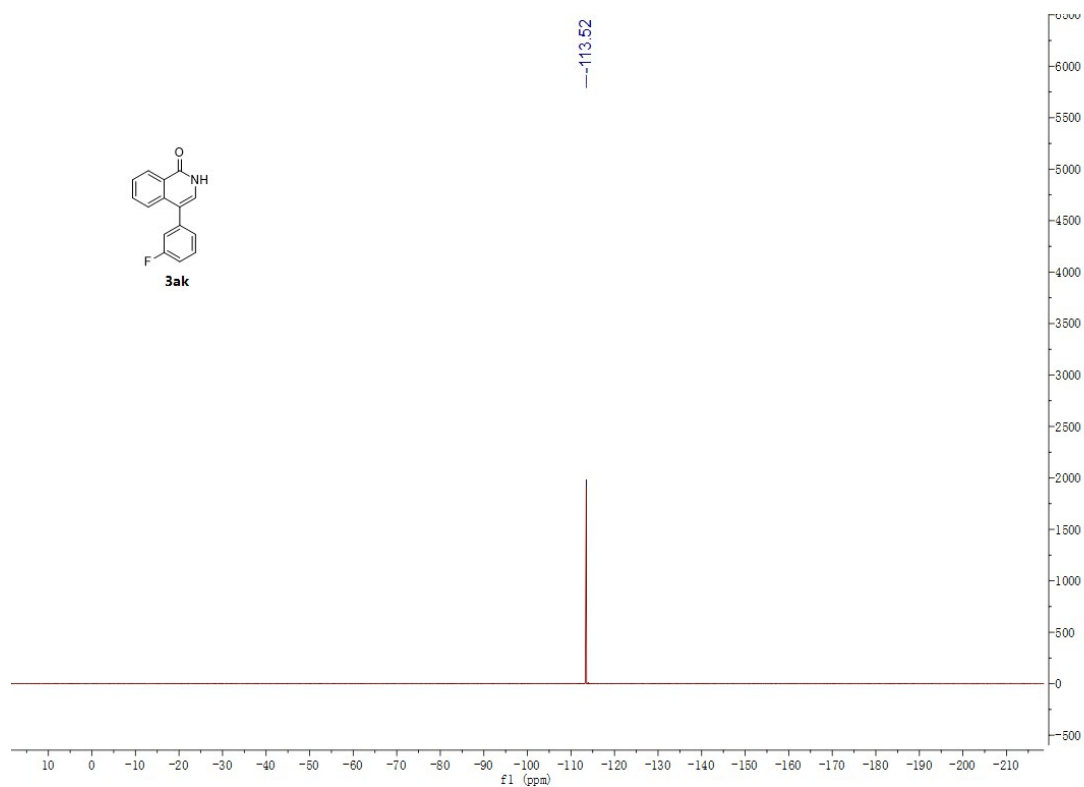

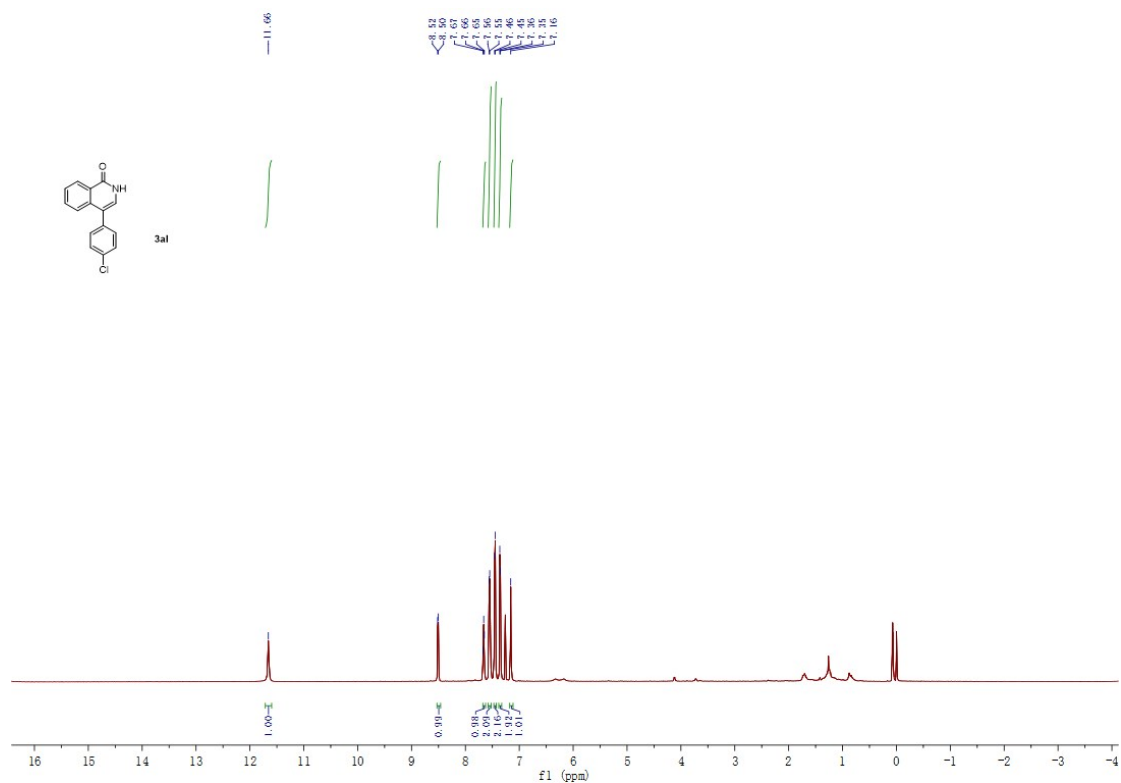

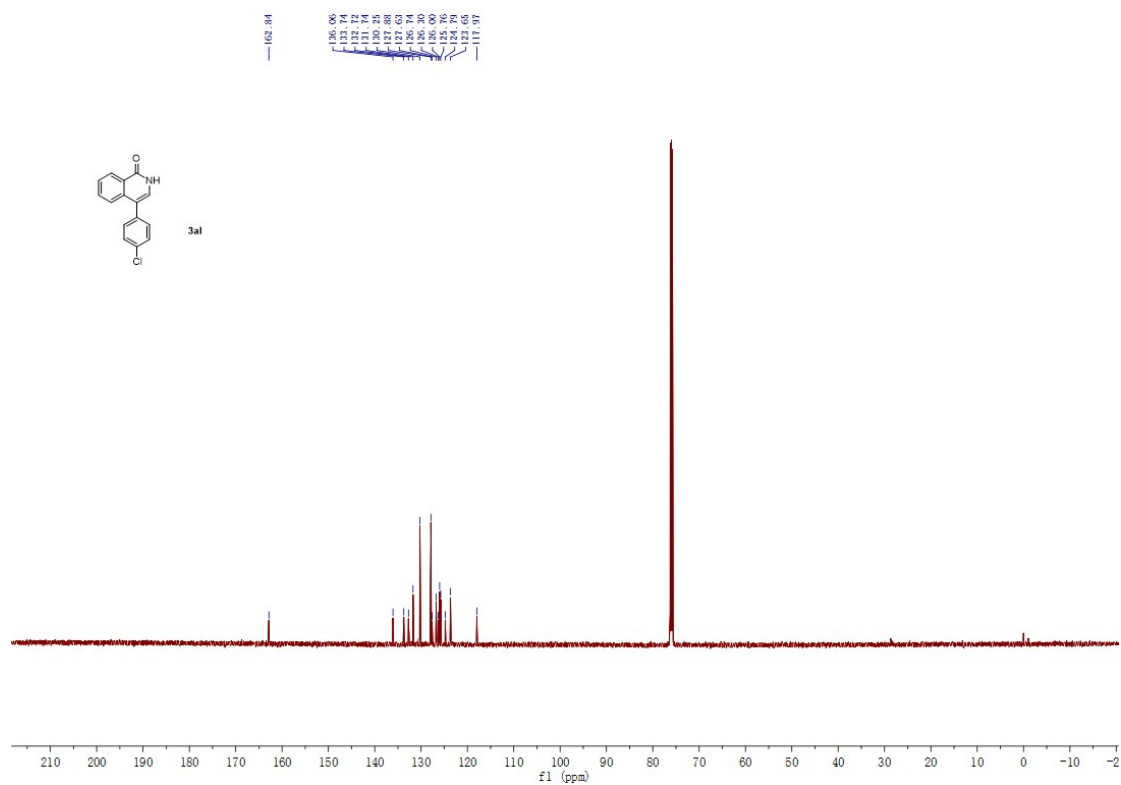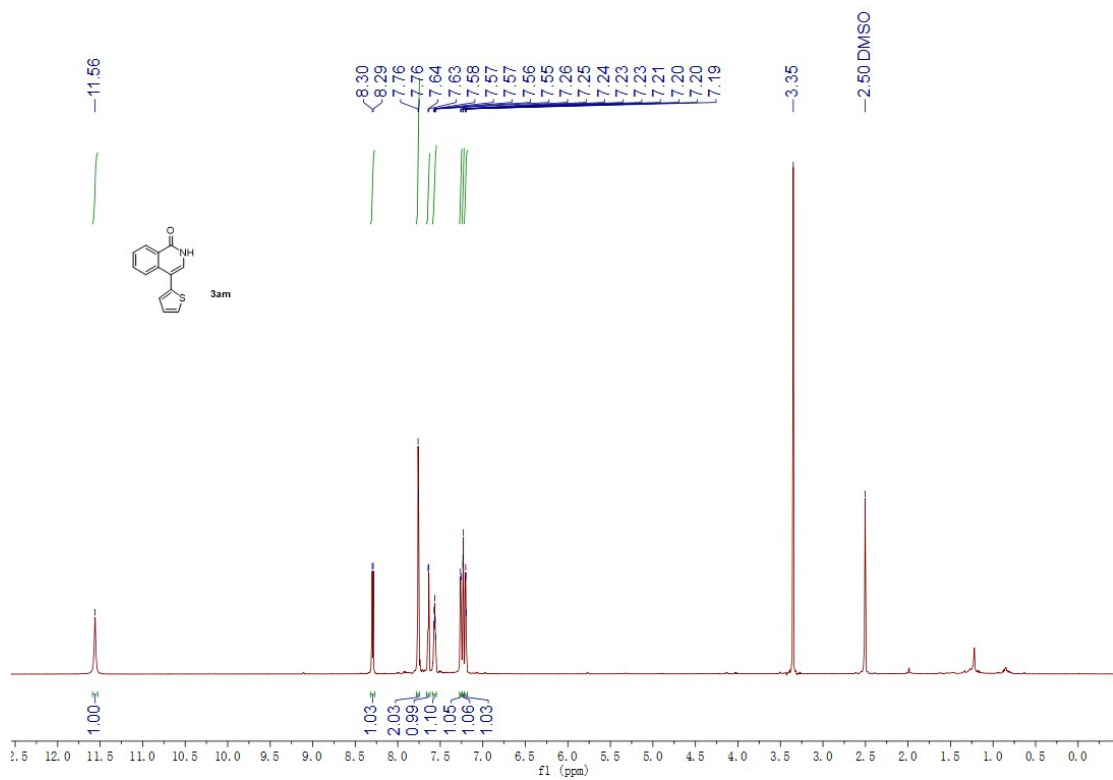

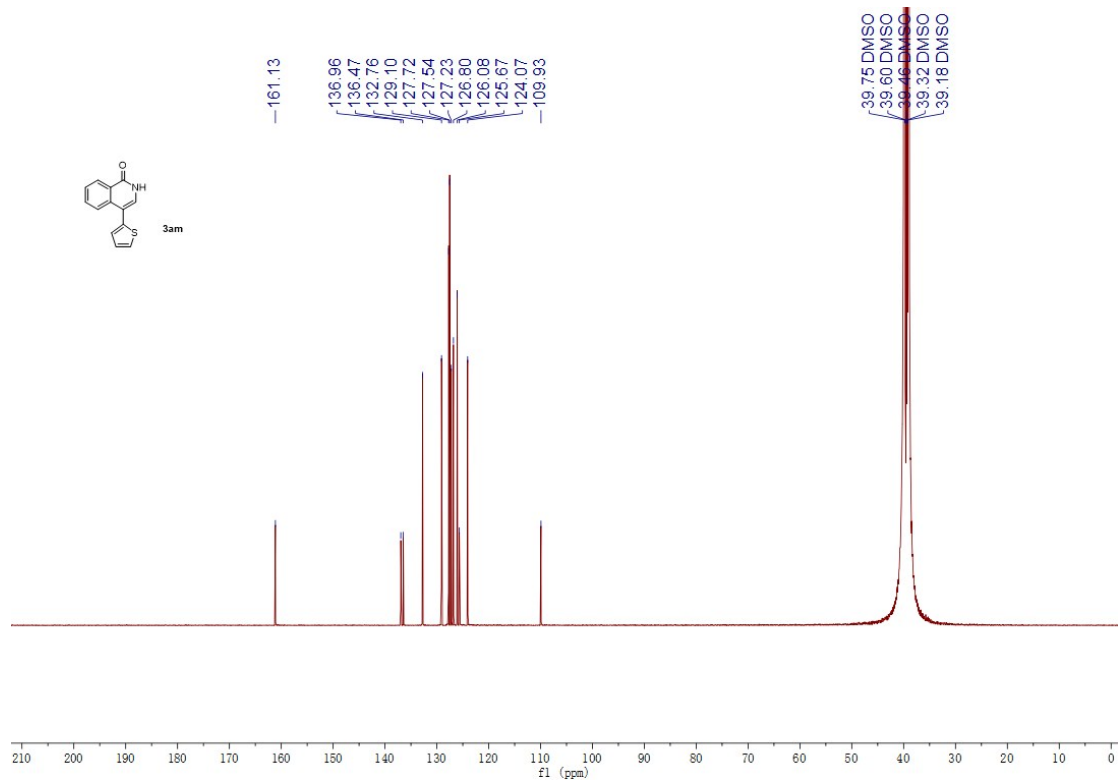

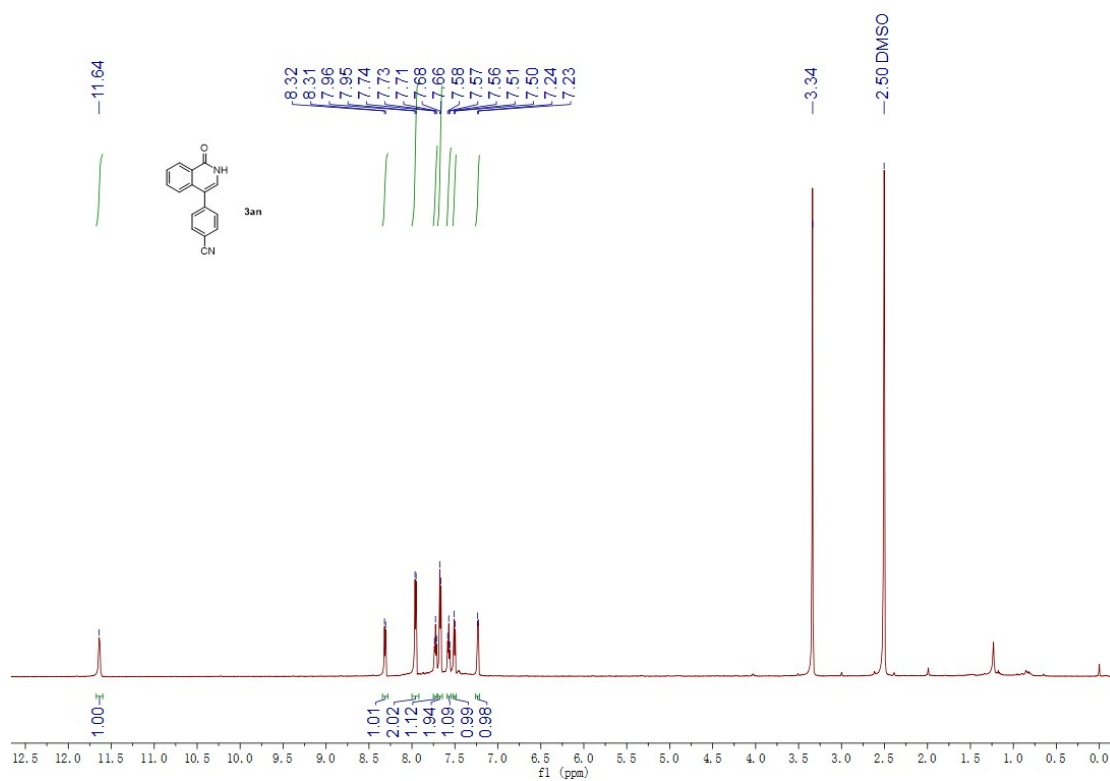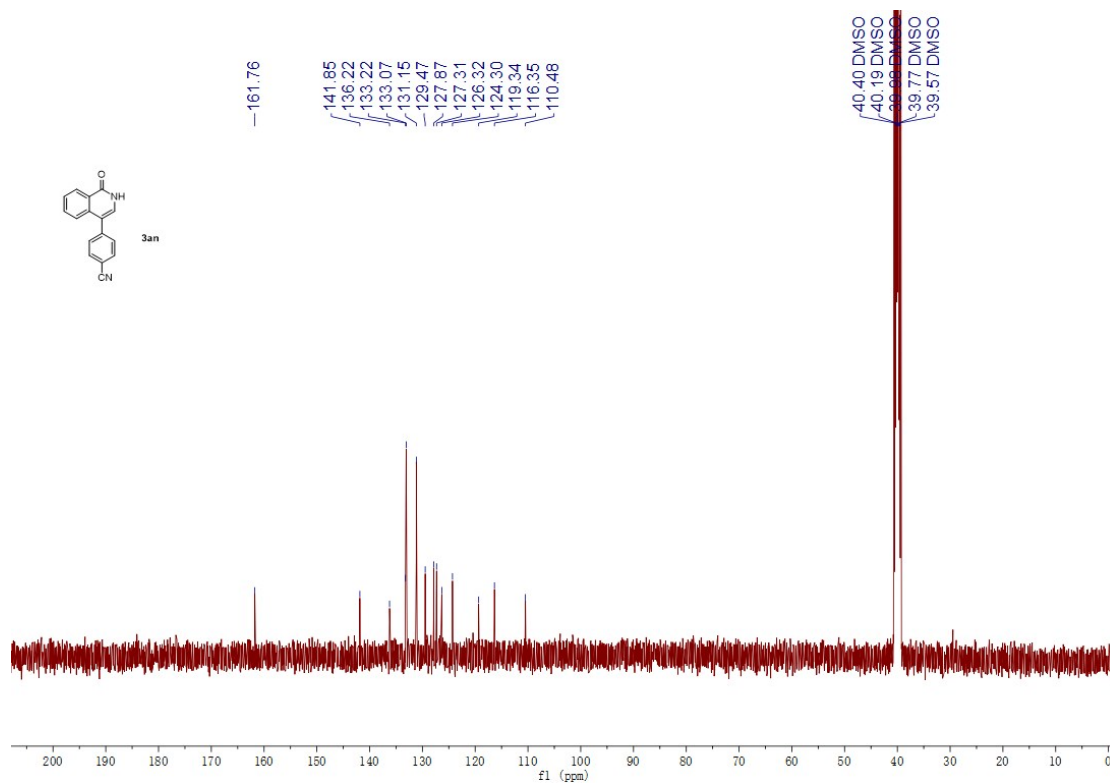

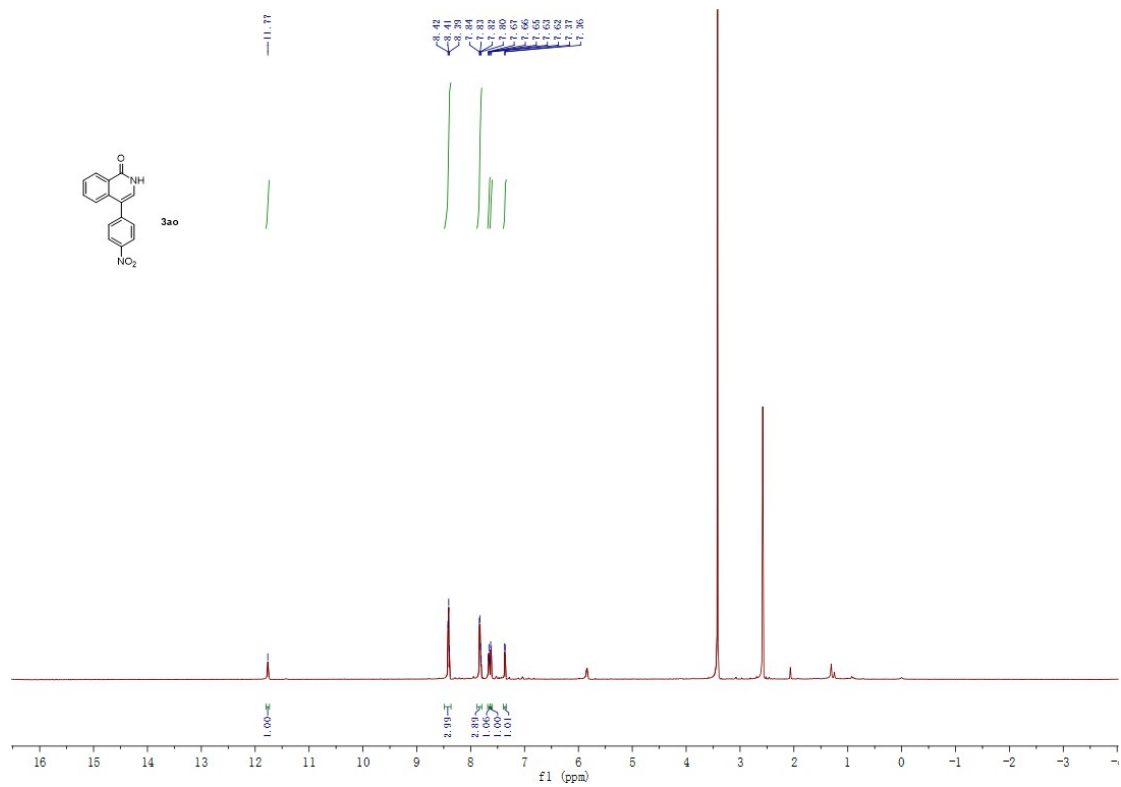

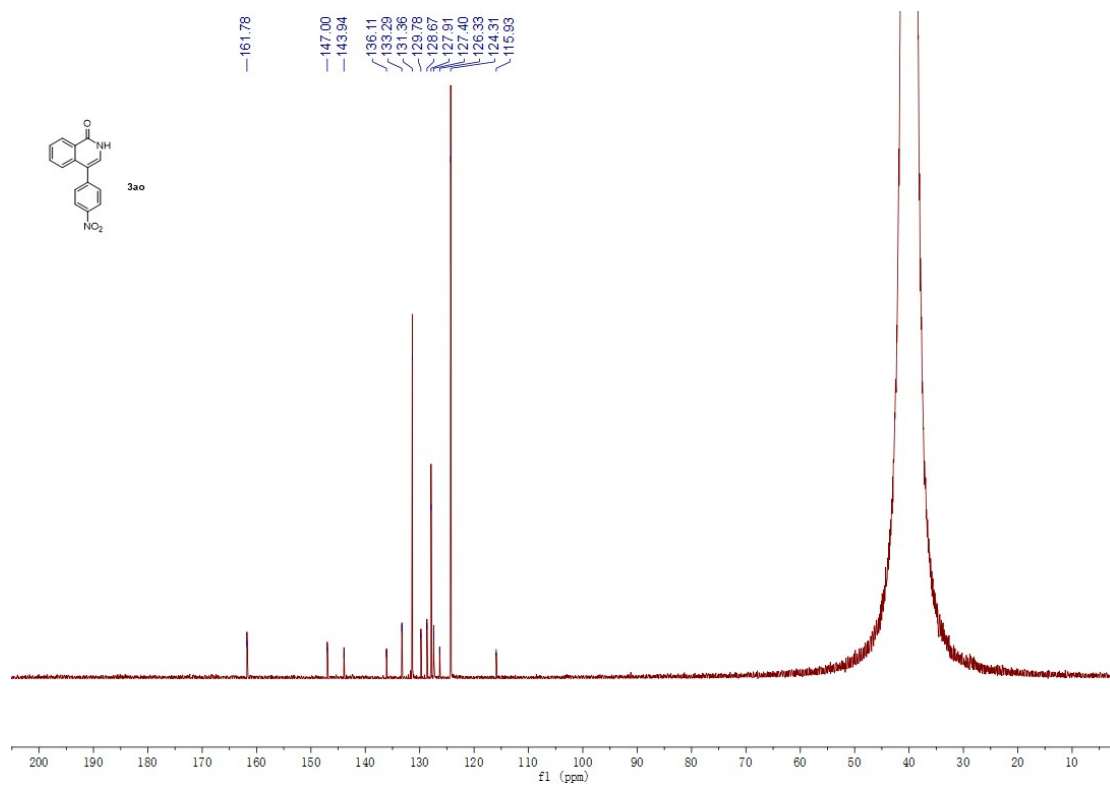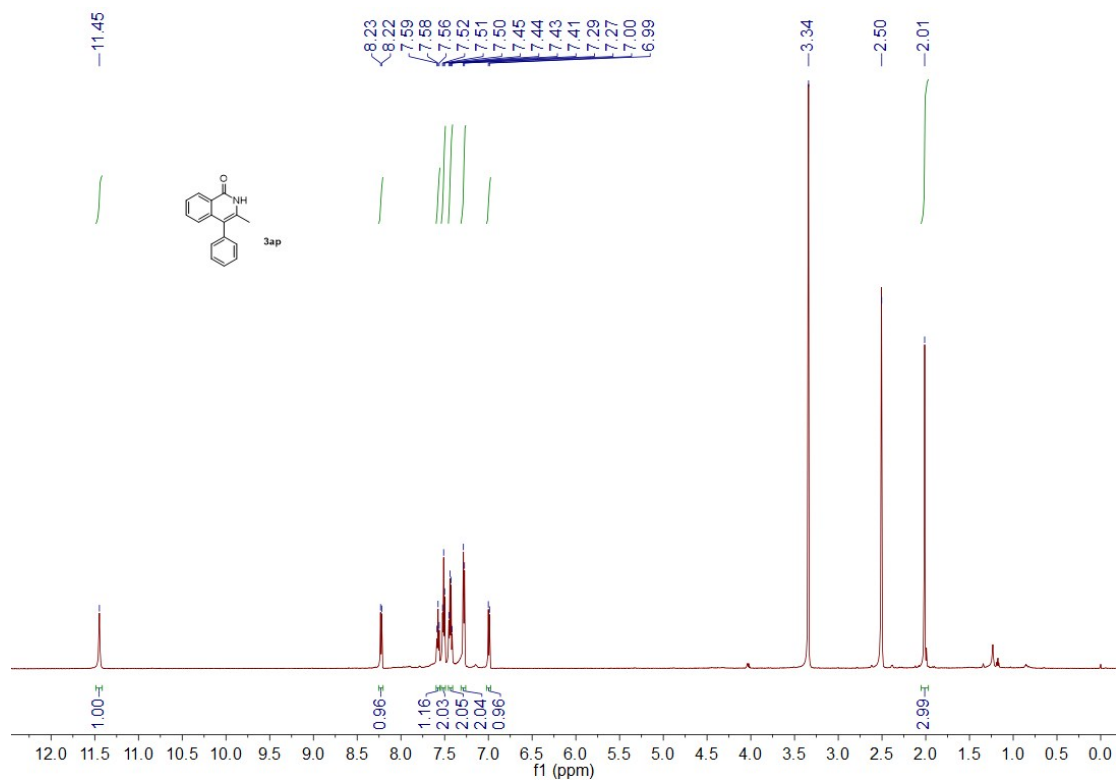

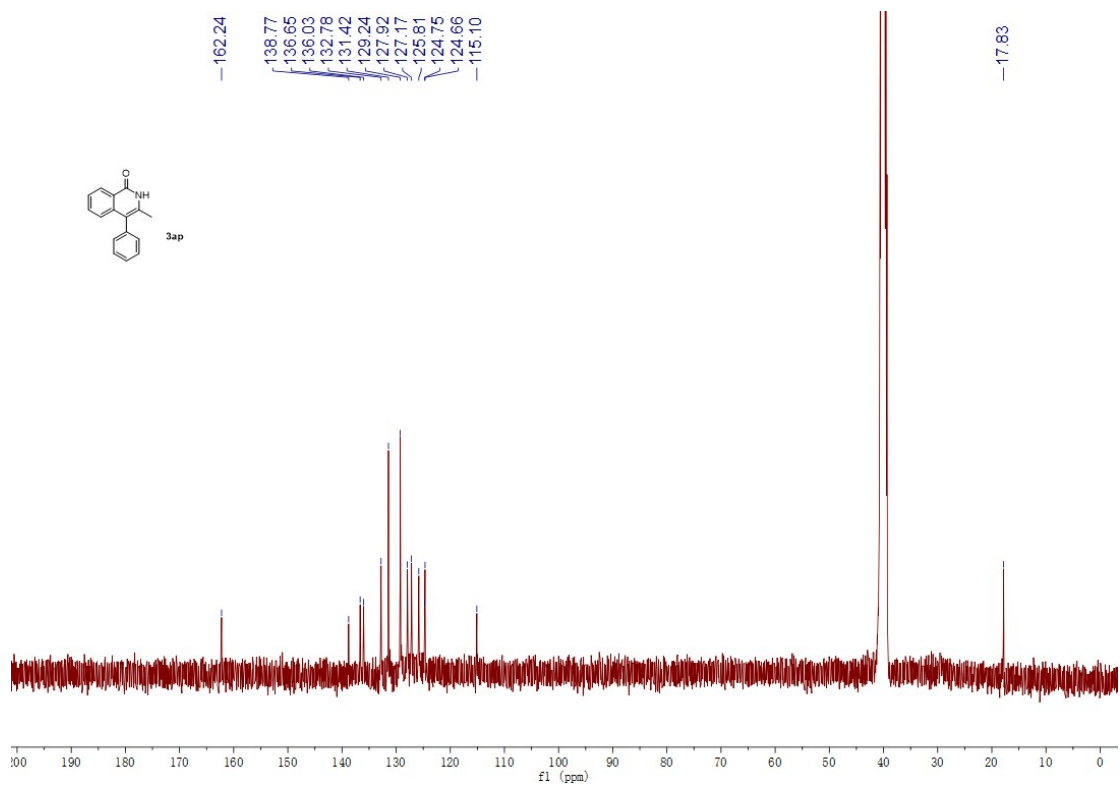

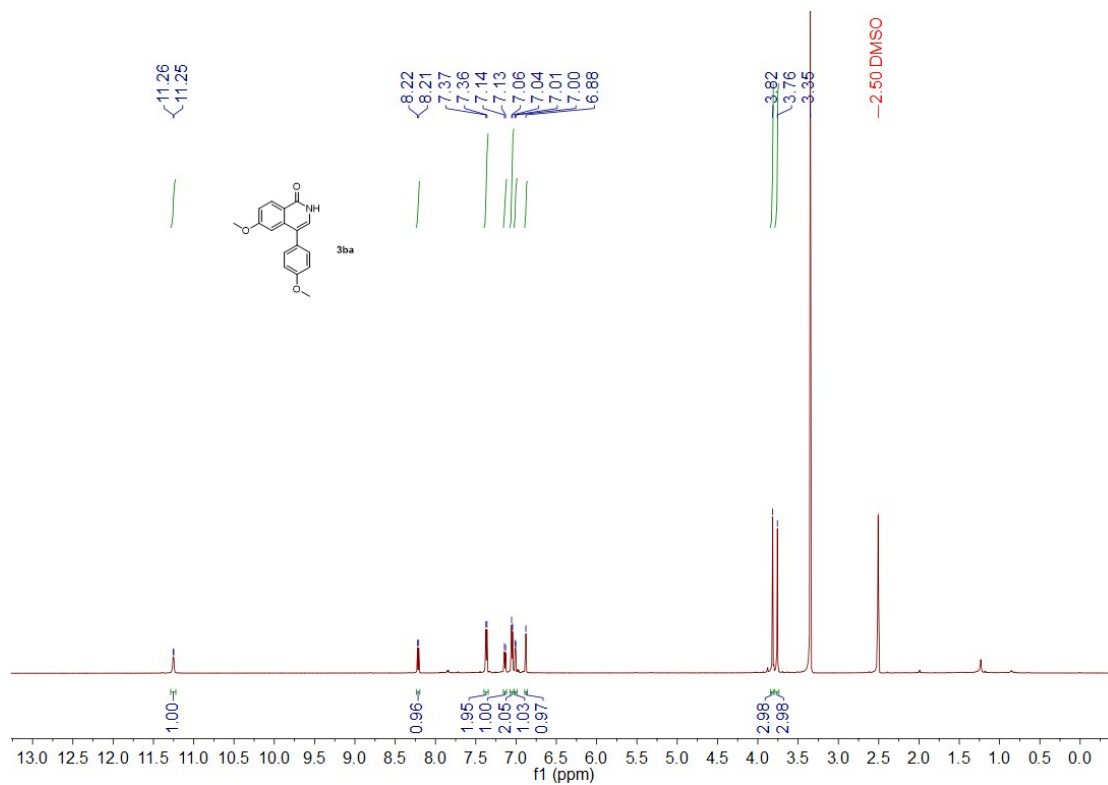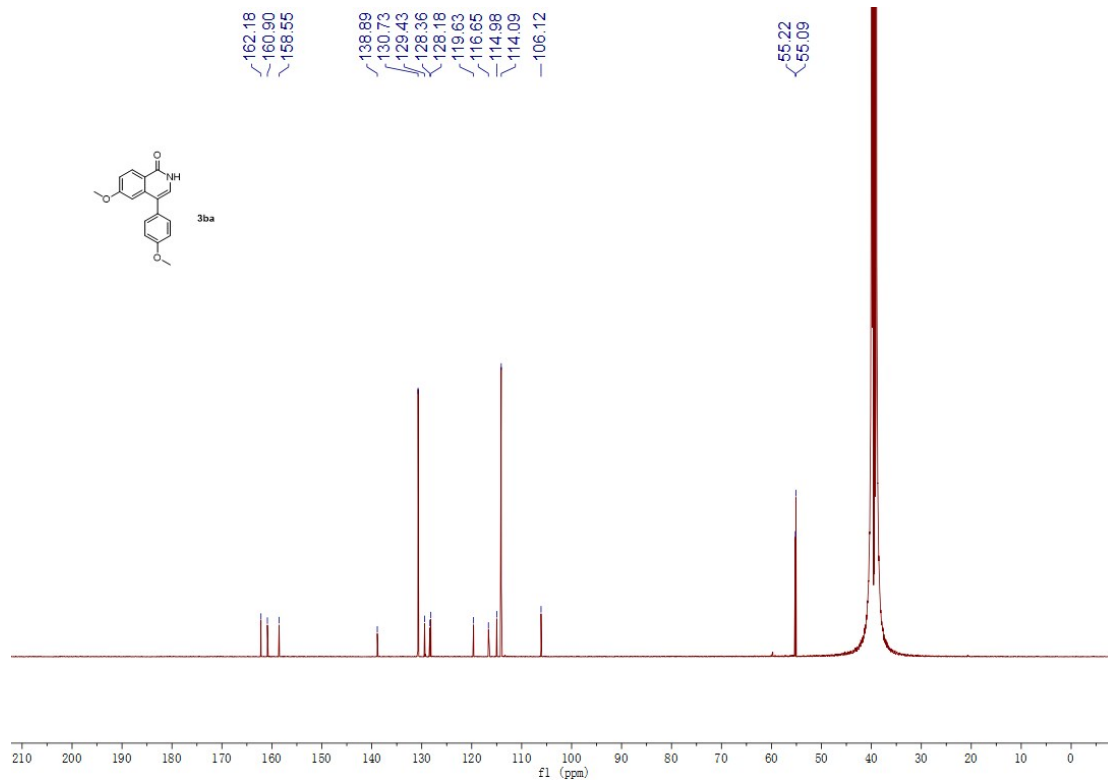

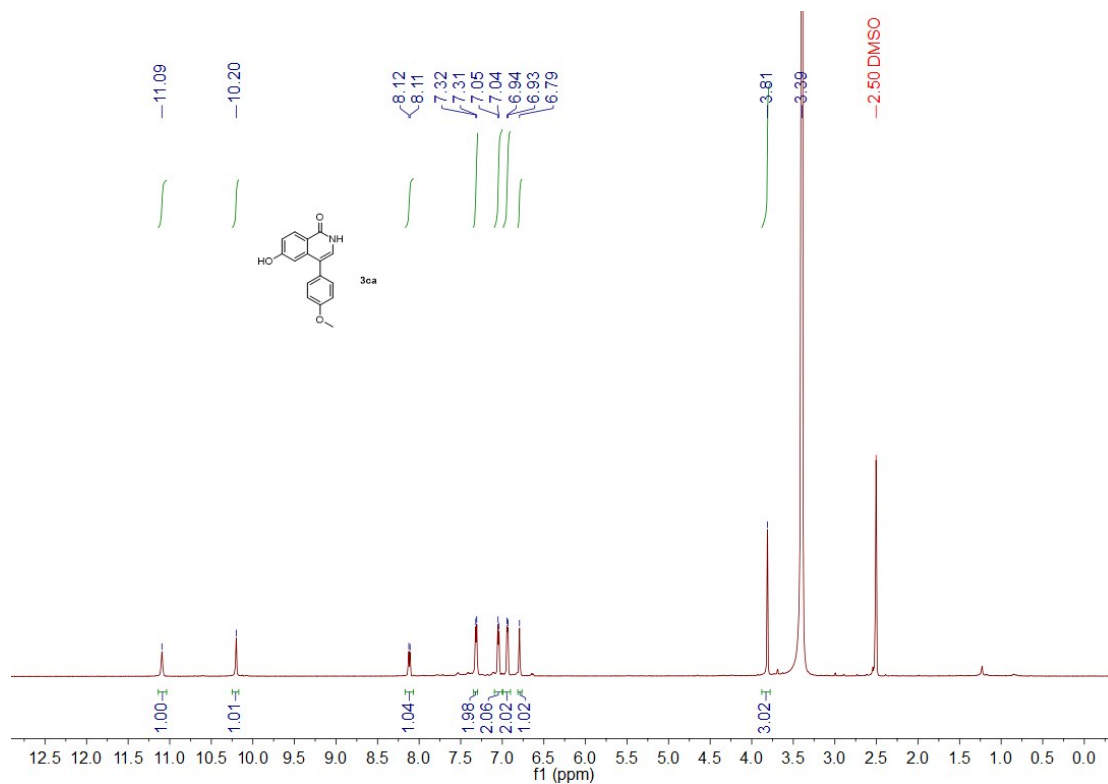

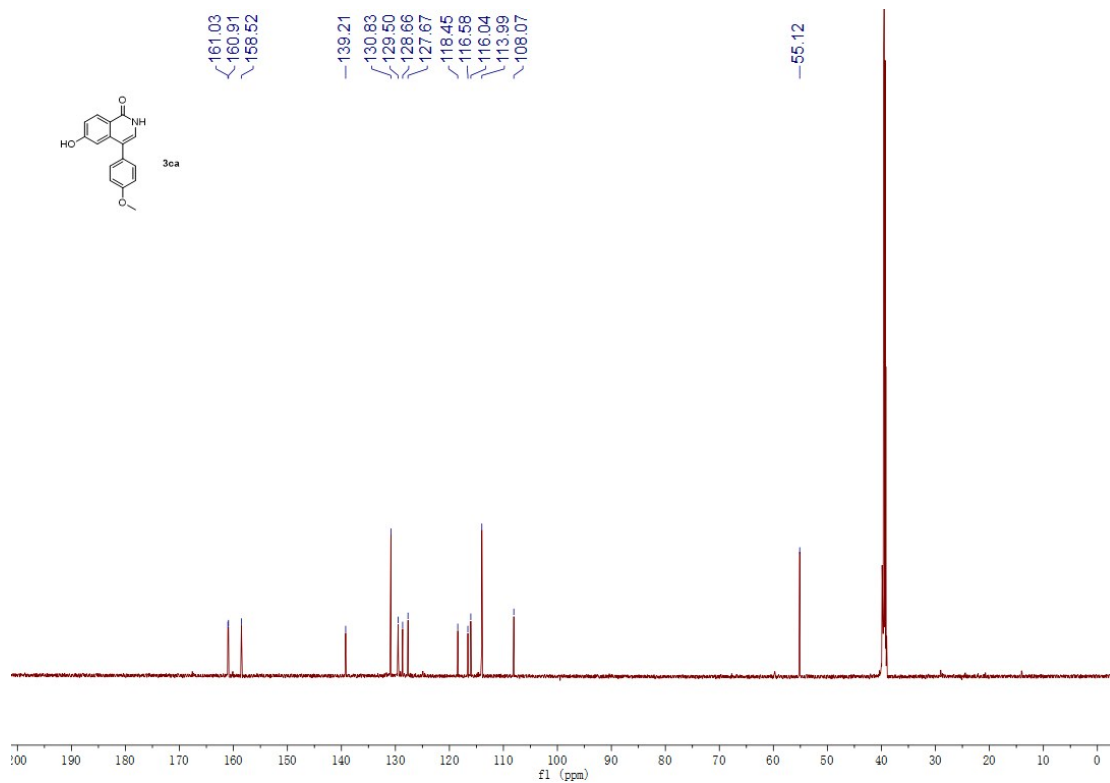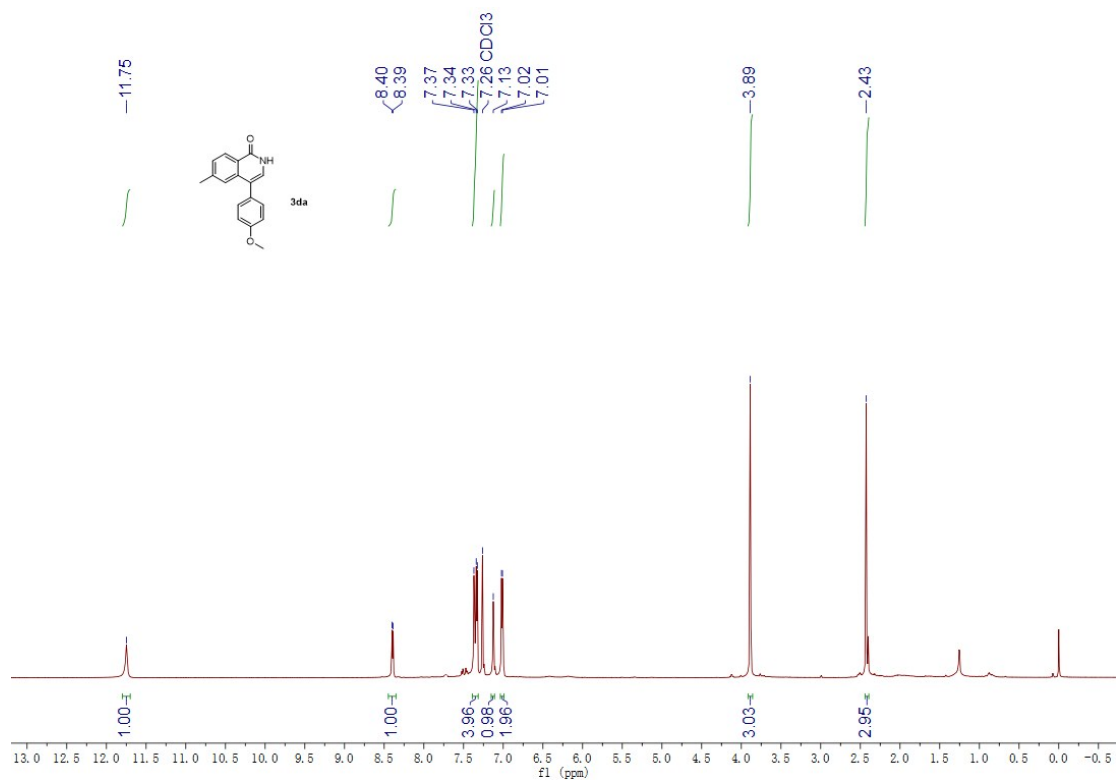

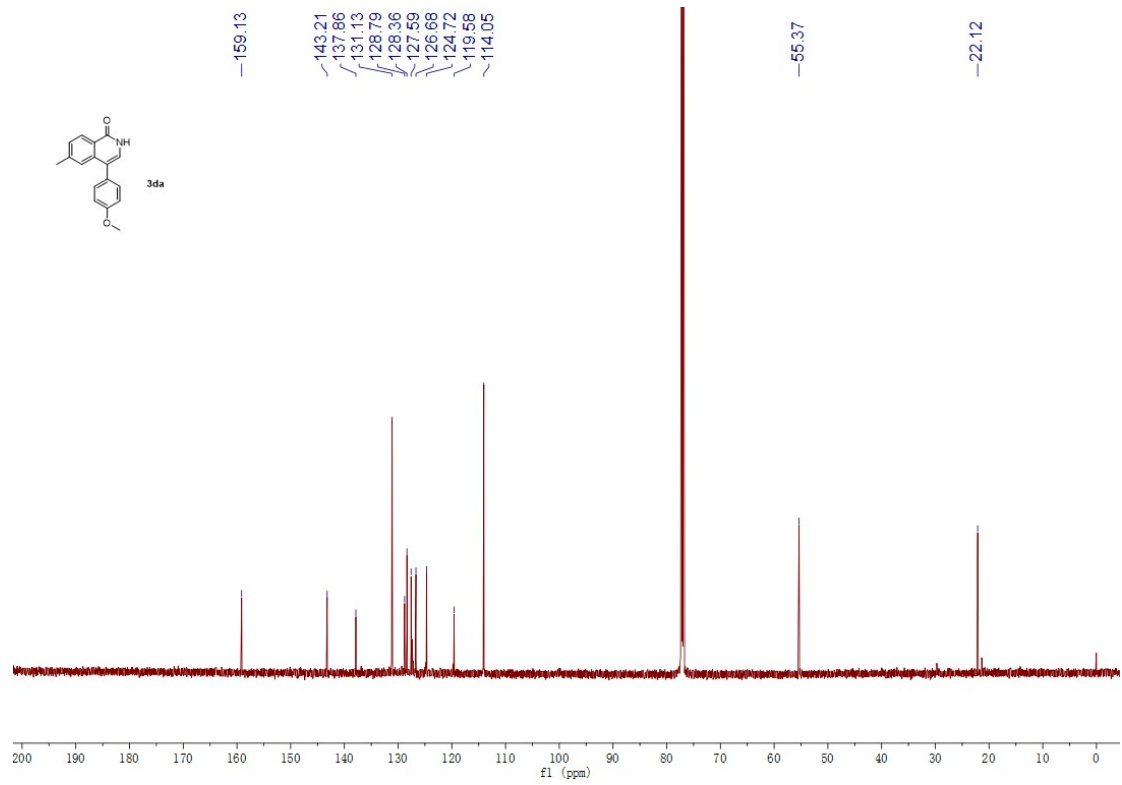

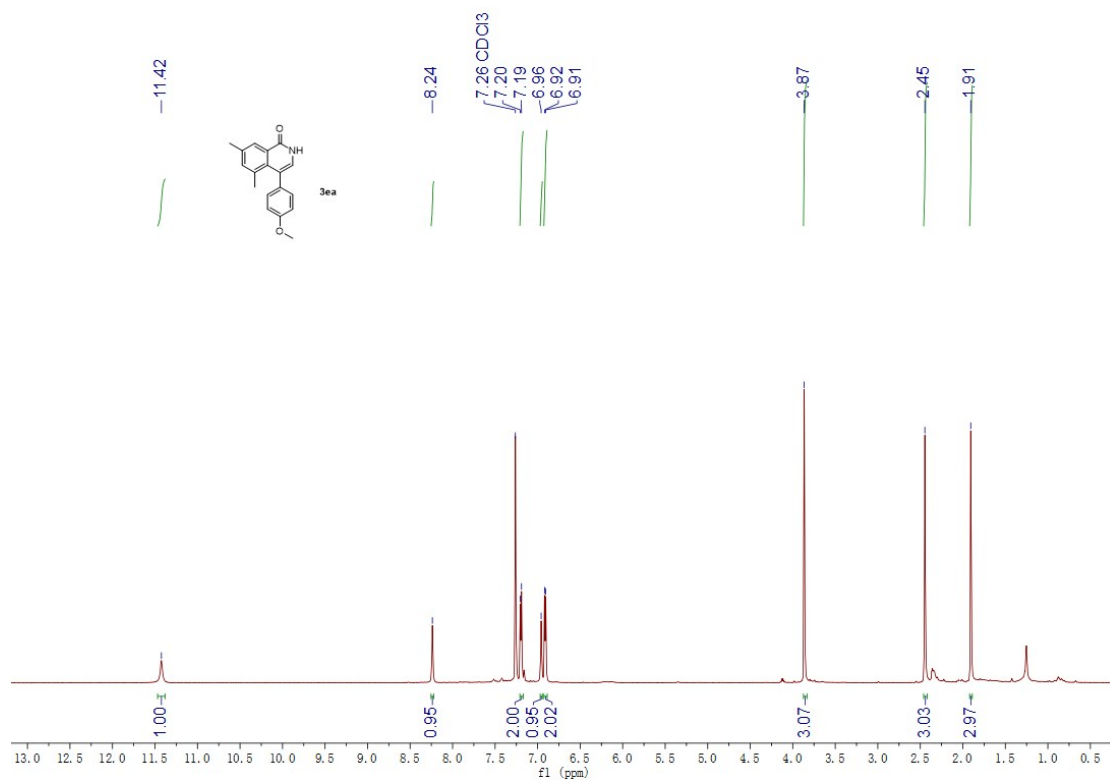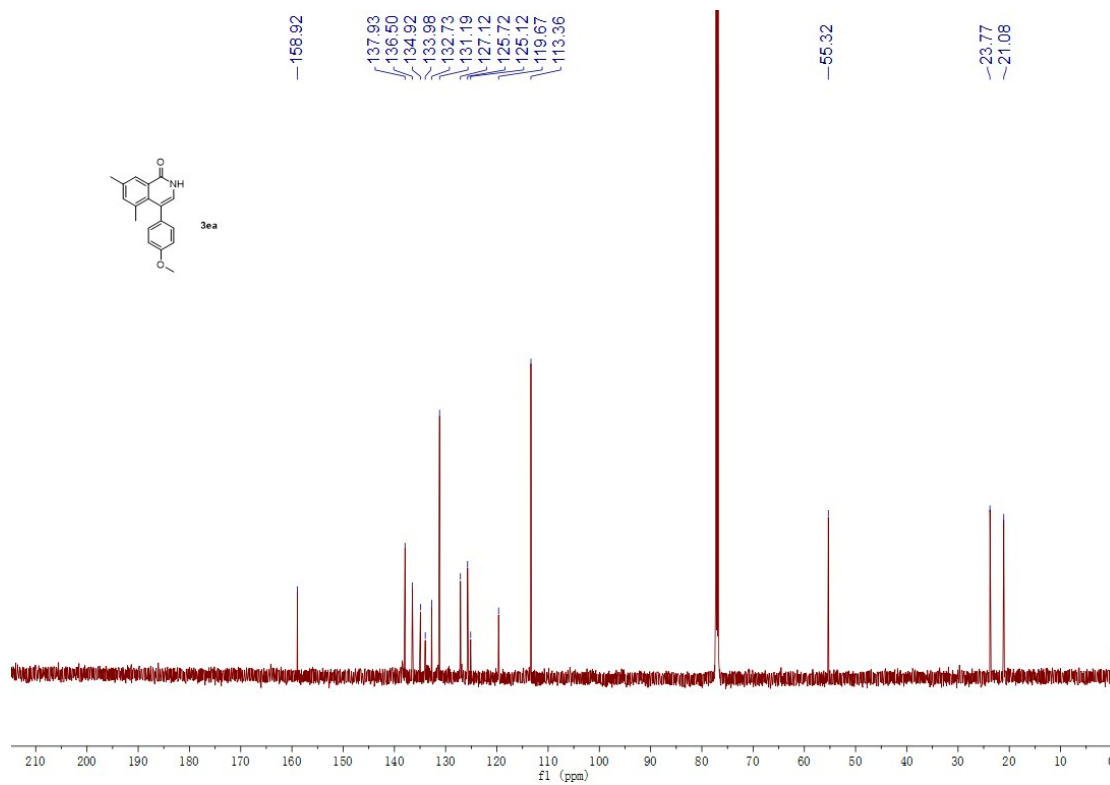

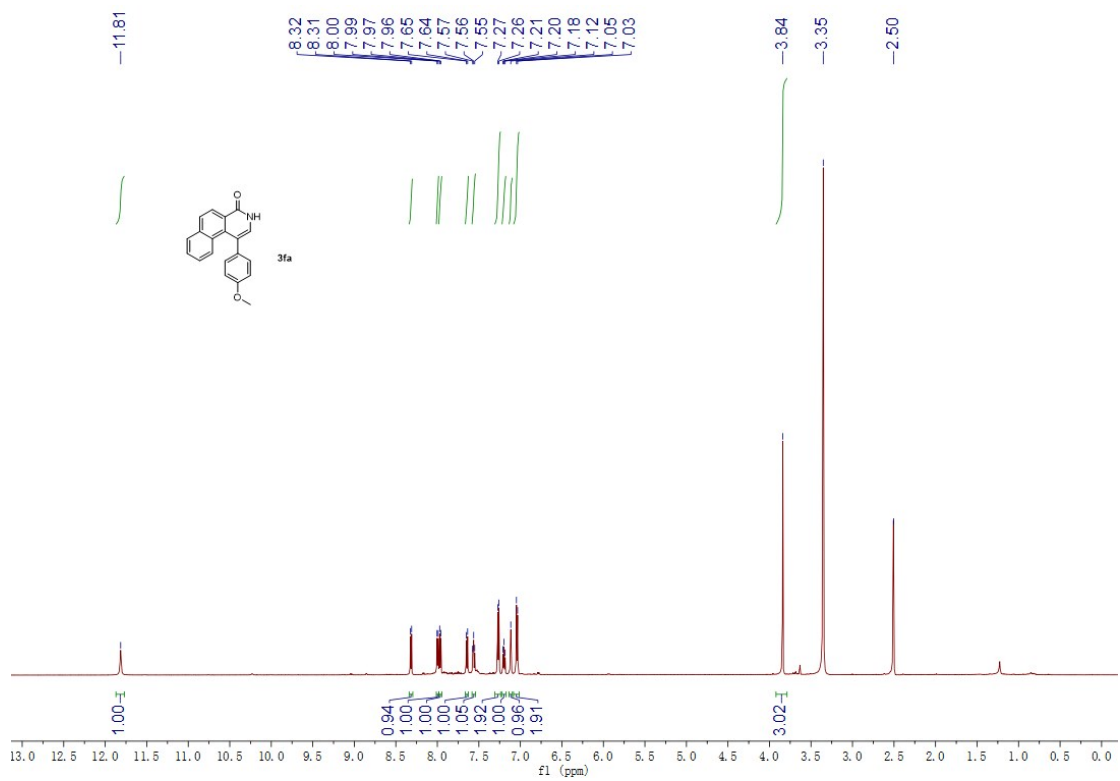

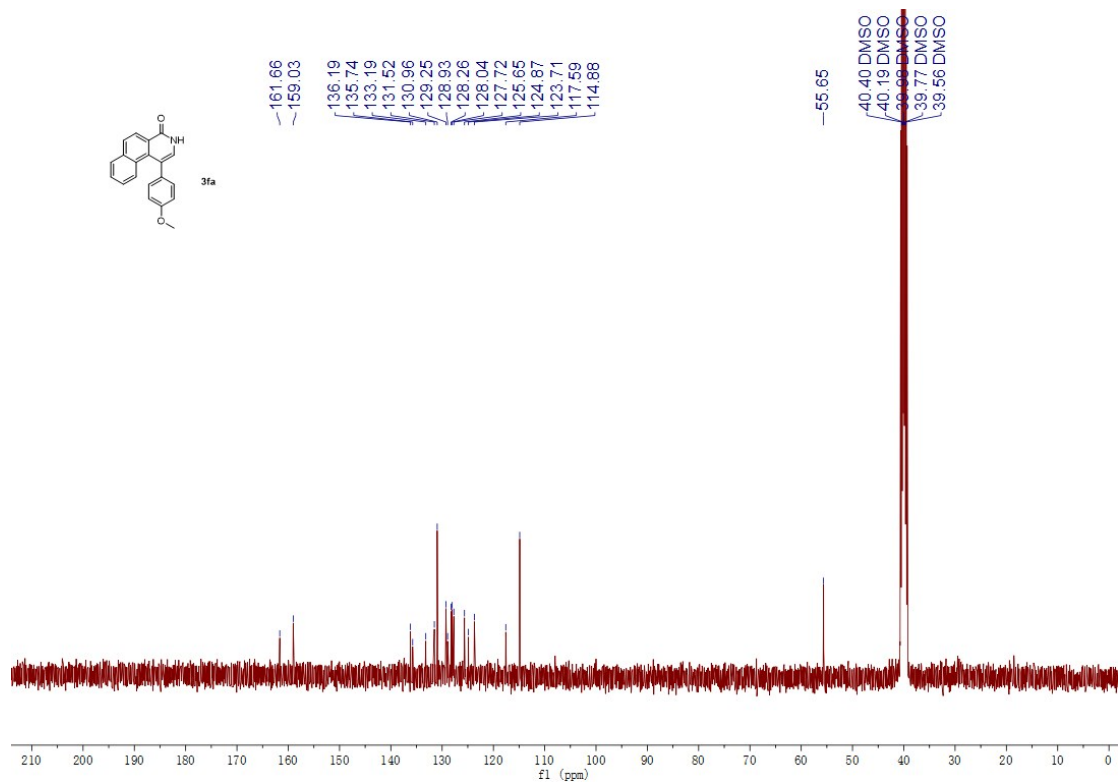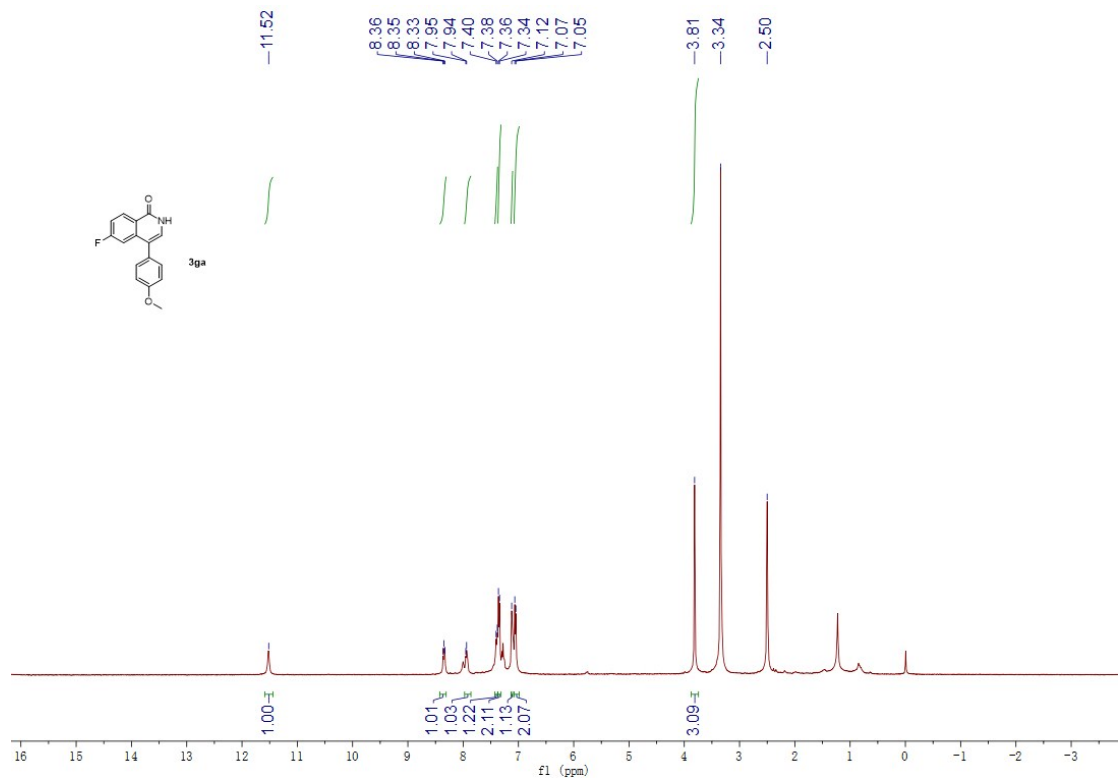

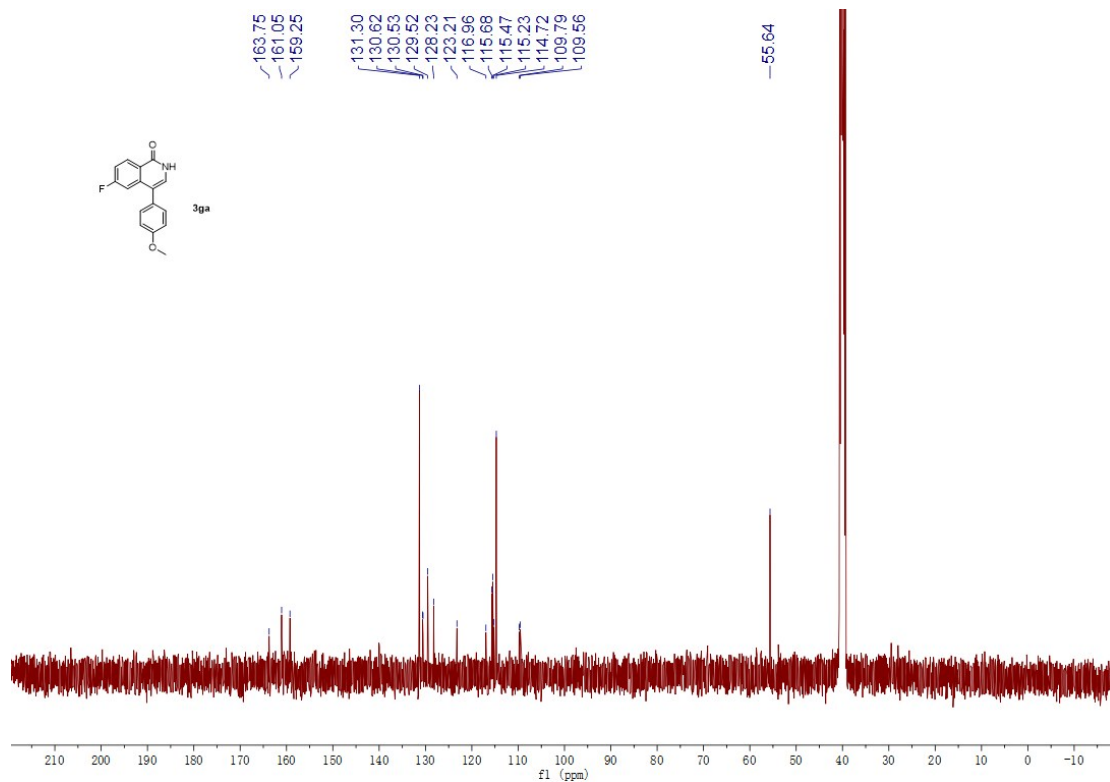

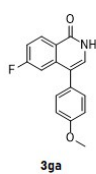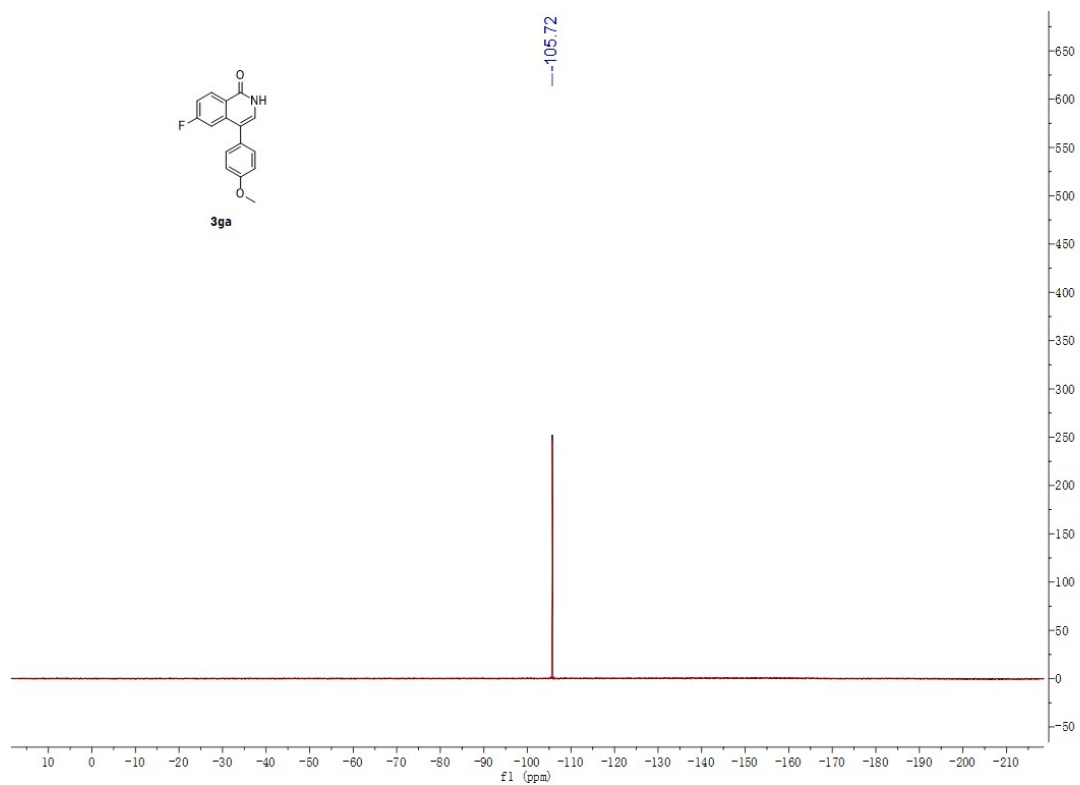

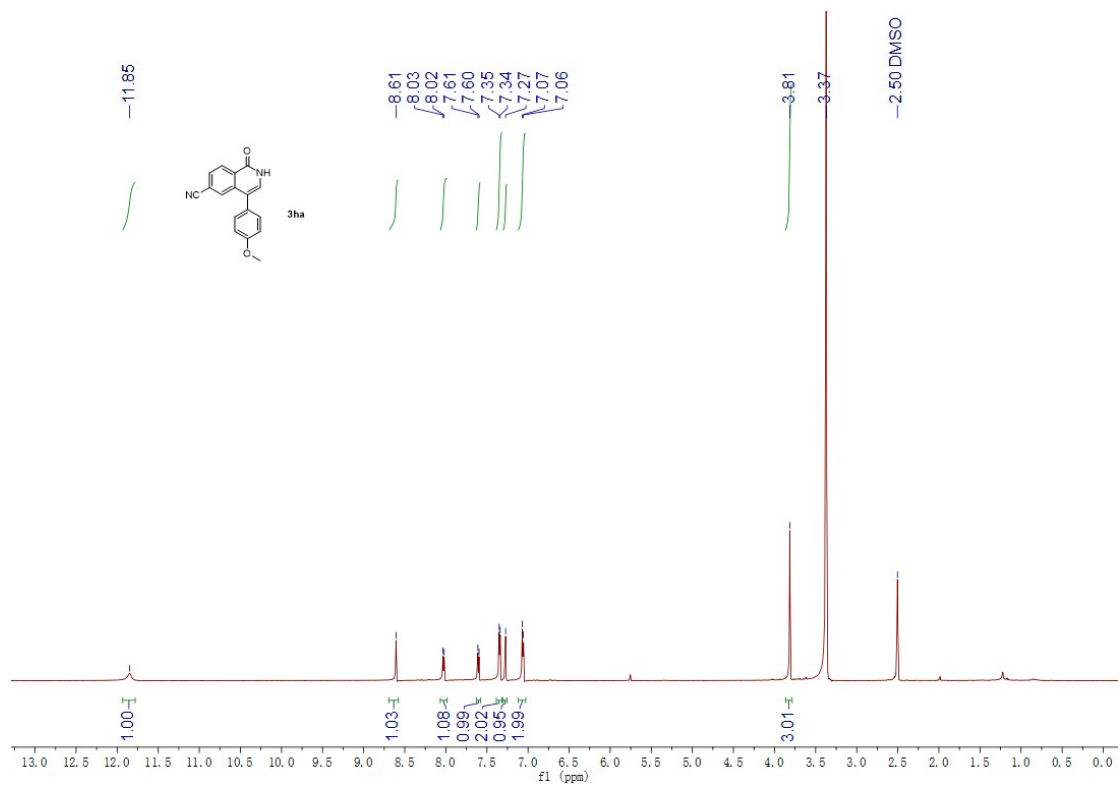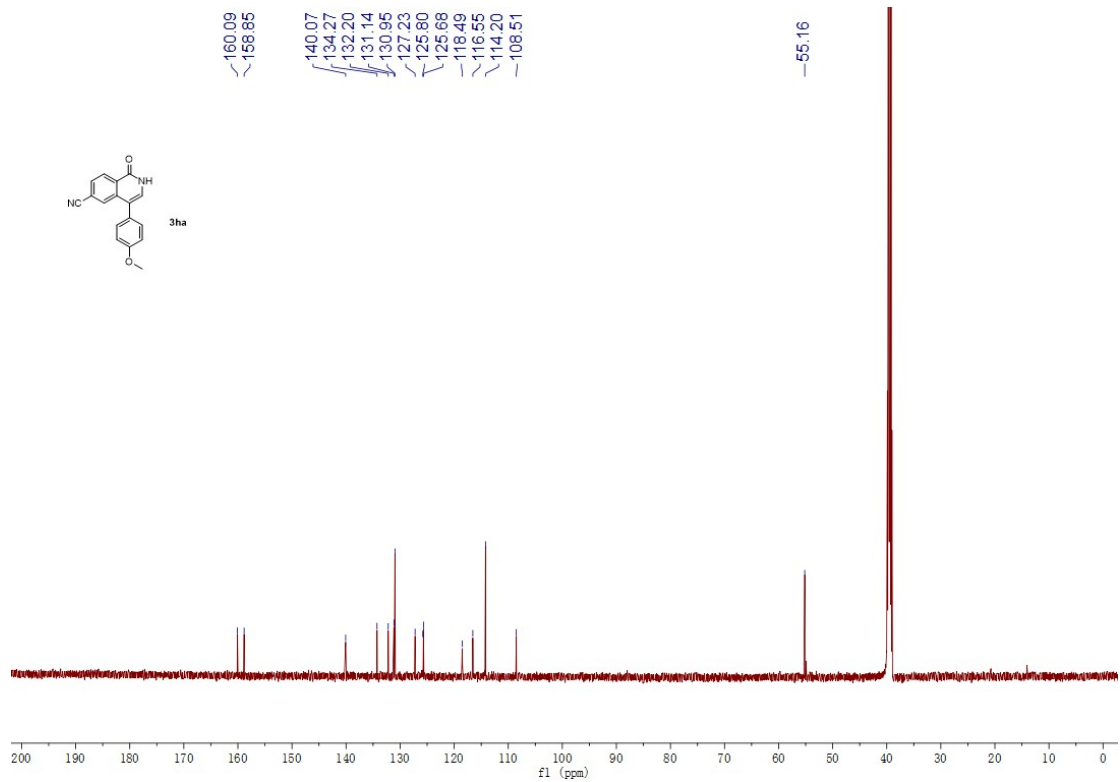

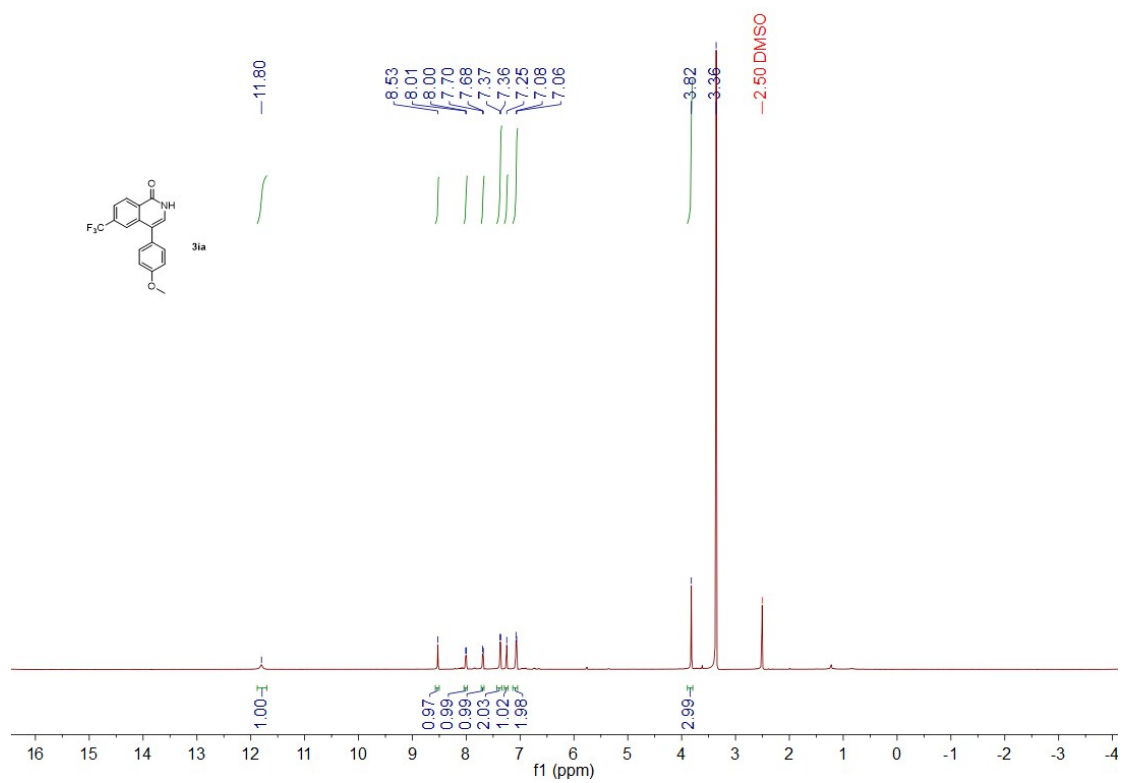

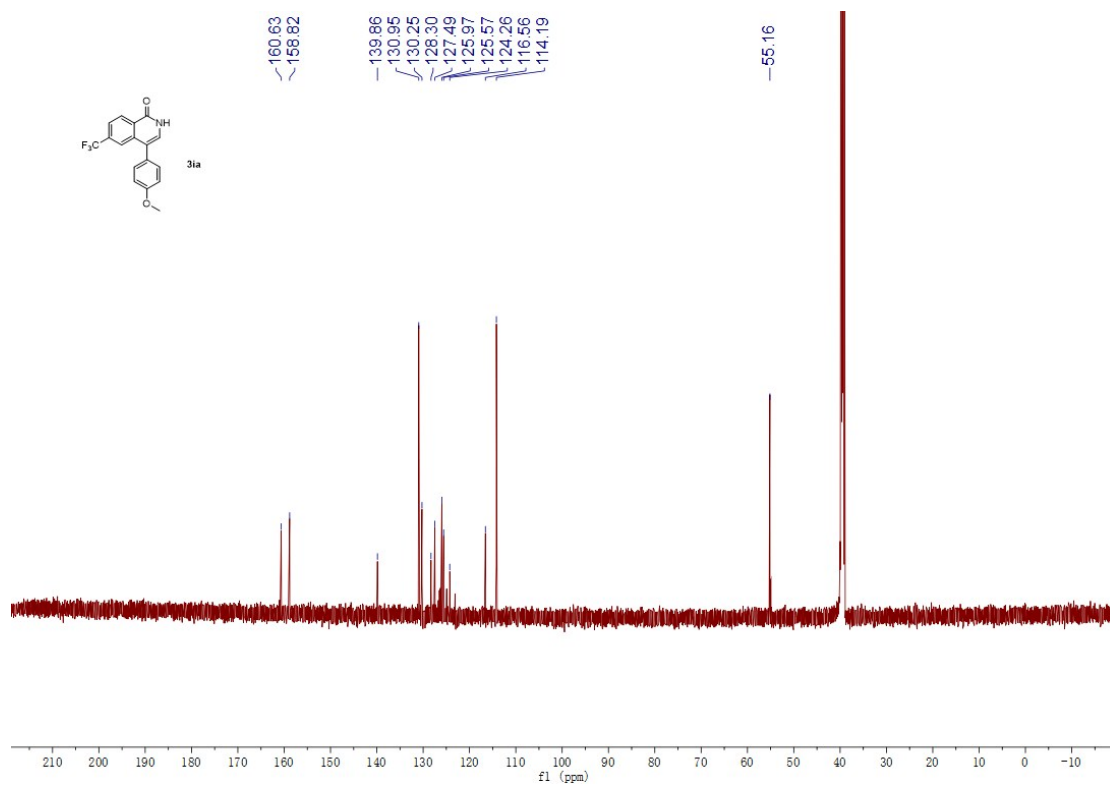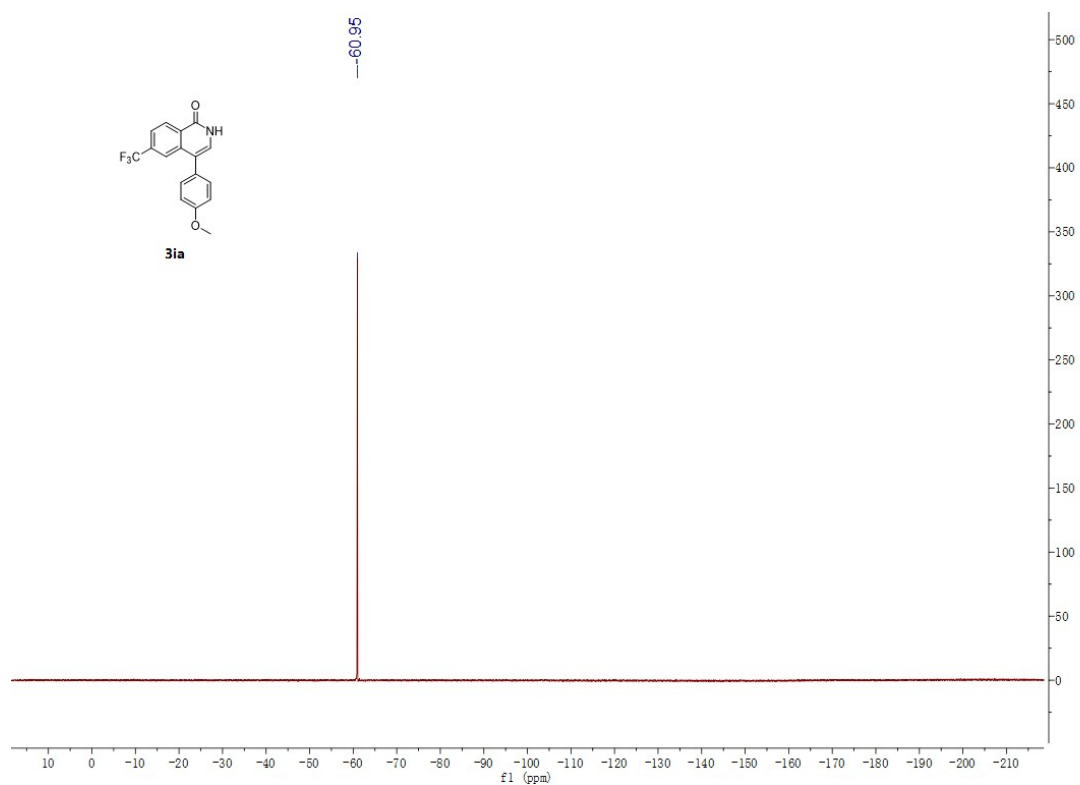

Supplement: d0cc01333a1.pdf [file d0cc01333a1.pdf]
